# Supplementary material for: Reduced graphene oxide coated porous carbon–sulfur nanofiber as a flexible paper electrode for lithium–sulfur batteries
Source: Royal Society of Chemistry journal article supplement (doi:10.1039/c7nr02423a), 2017-01-01
Supplement: c7nr02423a1.pdf [file c7nr02423a1.pdf]

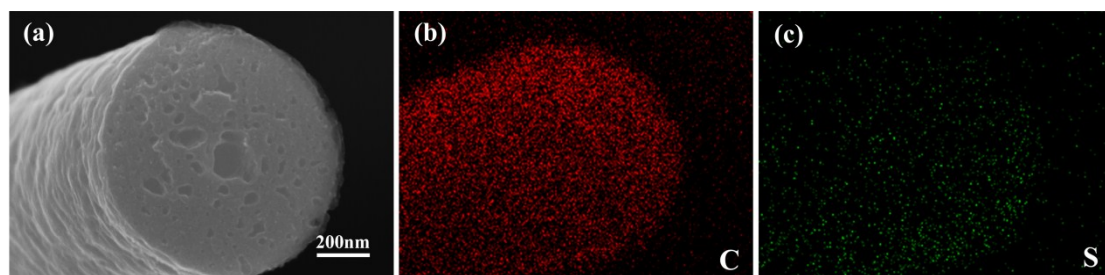

Fig. S1 SEM image of the cross section of nanofiber of S-PCNP (a) and the sulfur and carbon mappings (b, c)

After the solvent evaporation, a large amount of sulfur nanoparticles were became smaller nanoparticals and embedded into the inner of nanofibers
