# Supplementary material for: Reduced graphene oxide coated porous carbon–sulfur nanofiber as a flexible paper electrode for lithium–sulfur batteries
Source: Royal Society of Chemistry journal article supplement (doi:10.1039/c7nr02423a), 2017-01-01
Supplement: c7nr02423a2.xlsx [file c7nr02423a2.xlsx]

## Sheet: Sheet1
rGO@S-PCNP		S-PCNP		PCNP		PCNP（remove the peak of Si）
10	184	10	185	10	296	10	296
10.02	167	10.02	191	10.02	307	10.02	307
10.04	153	10.04	186	10.04	296	10.04	296
10.06	166	10.06	181	10.06	292	10.06	292
10.08	160	10.08	188	10.08	270	10.08	270
10.1	170	10.1	194	10.1	293	10.1	293
10.12	170	10.12	175	10.12	274	10.12	274
10.14	161	10.14	157	10.14	305	10.14	305
10.16	197	10.16	152	10.16	286	10.16	286
10.18	158	10.18	183	10.18	270	10.18	270
10.2	153	10.2	180	10.2	291	10.2	291
10.22	162	10.22	169	10.22	258	10.22	258
10.24	163	10.24	156	10.24	288	10.24	288
10.26	157	10.26	149	10.26	259	10.26	259
10.28	161	10.28	156	10.28	286	10.28	286
10.3	162	10.3	195	10.3	251	10.3	251
10.32	156	10.32	162	10.32	268	10.32	268
10.34	166	10.34	154	10.34	260	10.34	260
10.36	165	10.36	168	10.36	280	10.36	280
10.38	169	10.38	172	10.38	284	10.38	284
10.4	145	10.4	152	10.4	276	10.4	276
10.42	163	10.42	185	10.42	295	10.42	295
10.44	160	10.44	178	10.44	248	10.44	248
10.46	181	10.46	161	10.46	266	10.46	266
10.48	147	10.48	155	10.48	256	10.48	256
10.5	162	10.5	149	10.5	265	10.5	265
10.52	177	10.52	160	10.52	260	10.52	260
10.54	172	10.54	152	10.54	263	10.54	263
10.56	184	10.56	142	10.56	246	10.56	246
10.58	170	10.58	146	10.58	281	10.58	281
10.6	185	10.6	166	10.6	256	10.6	256
10.62	157	10.62	177	10.62	230	10.62	230
10.64	164	10.64	162	10.64	264	10.64	264
10.66	161	10.66	161	10.66	244	10.66	244
10.68	156	10.68	153	10.68	246	10.68	246
10.7	150	10.7	163	10.7	252	10.7	252
10.72	135	10.72	168	10.72	249	10.72	249
10.74	152	10.74	148	10.74	225	10.74	225
10.76	145	10.76	163	10.76	248	10.76	248
10.78	160	10.78	152	10.78	271	10.78	271
10.8	169	10.8	132	10.8	258	10.8	258
10.82	147	10.82	142	10.82	255	10.82	255
10.84	159	10.84	159	10.84	244	10.84	244
10.86	148	10.86	164	10.86	247	10.86	247
10.88	149	10.88	155	10.88	277	10.88	277
10.9	152	10.9	127	10.9	219	10.9	219
10.92	150	10.92	140	10.92	243	10.92	243
10.94	164	10.94	155	10.94	251	10.94	251
10.96	139	10.96	159	10.96	286	10.96	286
10.98	158	10.98	130	10.98	226	10.98	226
11	149	11	142	11	260	11	260
11.02	129	11.02	131	11.02	252	11.02	252
11.04	146	11.04	151	11.04	253	11.04	253
11.06	156	11.06	153	11.06	222	11.06	222
11.08	145	11.08	130	11.08	223	11.08	223
11.1	137	11.1	131	11.1	281	11.1	281
11.12	123	11.12	141	11.12	248	11.12	248
11.14	142	11.14	147	11.14	257	11.14	257
11.16	153	11.16	152	11.16	196	11.16	196
11.18	144	11.18	139	11.18	266	11.18	266
11.2	148	11.2	135	11.2	227	11.2	227
11.22	113	11.22	146	11.22	246	11.22	246
11.24	138	11.24	151	11.24	241	11.24	241
11.26	129	11.26	159	11.26	227	11.26	227
11.28	136	11.28	158	11.28	229	11.28	229
11.3	138	11.3	146	11.3	233	11.3	233
11.32	141	11.32	149	11.32	246	11.32	246
11.34	148	11.34	134	11.34	225	11.34	225
11.36	150	11.36	165	11.36	236	11.36	236
11.38	138	11.38	154	11.38	243	11.38	243
11.4	126	11.4	173	11.4	204	11.4	204
11.42	130	11.42	152	11.42	227	11.42	227
11.44	166	11.44	177	11.44	235	11.44	235
11.46	159	11.46	180	11.46	231	11.46	231
11.48	154	11.48	206	11.48	238	11.48	238
11.5	149	11.5	218	11.5	236	11.5	236
11.52	153	11.52	225	11.52	213	11.52	213
11.54	184	11.54	245	11.54	215	11.54	215
11.56	166	11.56	230	11.56	238	11.56	238
11.58	171	11.58	210	11.58	229	11.58	229
11.6	174	11.6	232	11.6	213	11.6	213
11.62	149	11.62	191	11.62	221	11.62	221
11.64	148	11.64	174	11.64	223	11.64	223
11.66	162	11.66	180	11.66	231	11.66	231
11.68	146	11.68	148	11.68	250	11.68	250
11.7	131	11.7	162	11.7	223	11.7	223
11.72	141	11.72	127	11.72	222	11.72	222
11.74	129	11.74	146	11.74	218	11.74	218
11.76	142	11.76	130	11.76	218	11.76	218
11.78	120	11.78	119	11.78	238	11.78	238
11.8	109	11.8	128	11.8	225	11.8	225
11.82	134	11.82	110	11.82	208	11.82	208
11.84	133	11.84	137	11.84	211	11.84	211
11.86	128	11.86	125	11.86	227	11.86	227
11.88	128	11.88	118	11.88	244	11.88	244
11.9	121	11.9	108	11.9	200	11.9	200
11.92	118	11.92	119	11.92	241	11.92	241
11.94	121	11.94	147	11.94	220	11.94	220
11.96	122	11.96	121	11.96	224	11.96	224
11.98	116	11.98	128	11.98	207	11.98	207
12	137	12	136	12	210	12	210
12.02	132	12.02	142	12.02	196	12.02	196
12.04	121	12.04	124	12.04	201	12.04	201
12.06	130	12.06	123	12.06	212	12.06	212
12.08	126	12.08	112	12.08	215	12.08	215
12.1	124	12.1	123	12.1	198	12.1	198
12.12	139	12.12	119	12.12	220	12.12	220
12.14	117	12.14	121	12.14	230	12.14	230
12.16	119	12.16	128	12.16	208	12.16	208
12.18	129	12.18	116	12.18	223	12.18	223
12.2	112	12.2	110	12.2	219	12.2	219
12.22	138	12.22	120	12.22	190	12.22	190
12.24	118	12.24	137	12.24	205	12.24	205
12.26	112	12.26	109	12.26	224	12.26	224
12.28	109	12.28	127	12.28	205	12.28	205
12.3	120	12.3	98	12.3	238	12.3	238
12.32	136	12.32	114	12.32	207	12.32	207
12.34	122	12.34	117	12.34	212	12.34	212
12.36	136	12.36	108	12.36	188	12.36	188
12.38	120	12.38	114	12.38	197	12.38	197
12.4	119	12.4	113	12.4	206	12.4	206
12.42	96	12.42	100	12.42	189	12.42	189
12.44	104	12.44	110	12.44	185	12.44	185
12.46	141	12.46	110	12.46	210	12.46	210
12.48	138	12.48	135	12.48	208	12.48	208
12.5	126	12.5	106	12.5	208	12.5	208
12.52	147	12.52	108	12.52	202	12.52	202
12.54	108	12.54	112	12.54	189	12.54	189
12.56	143	12.56	131	12.56	185	12.56	185
12.58	109	12.58	115	12.58	205	12.58	205
12.6	112	12.6	123	12.6	226	12.6	226
12.62	107	12.62	104	12.62	210	12.62	210
12.64	127	12.64	112	12.64	205	12.64	205
12.66	116	12.66	107	12.66	195	12.66	195
12.68	126	12.68	123	12.68	212	12.68	212
12.7	104	12.7	94	12.7	203	12.7	203
12.72	103	12.72	115	12.72	200	12.72	200
12.74	108	12.74	118	12.74	182	12.74	182
12.76	120	12.76	115	12.76	205	12.76	205
12.78	108	12.78	107	12.78	169	12.78	169
12.8	128	12.8	105	12.8	210	12.8	210
12.82	115	12.82	117	12.82	222	12.82	222
12.84	123	12.84	93	12.84	213	12.84	213
12.86	95	12.86	100	12.86	214	12.86	214
12.88	98	12.88	100	12.88	202	12.88	202
12.9	106	12.9	94	12.9	204	12.9	204
12.92	126	12.92	102	12.92	195	12.92	195
12.94	105	12.94	124	12.94	192	12.94	192
12.96	80	12.96	120	12.96	196	12.96	196
12.98	104	12.98	105	12.98	209	12.98	209
13	117	13	116	13	192	13	192
13.02	121	13.02	101	13.02	198	13.02	198
13.04	121	13.04	96	13.04	212	13.04	212
13.06	113	13.06	122	13.06	212	13.06	212
13.08	123	13.08	110	13.08	220	13.08	220
13.1	102	13.1	98	13.1	176	13.1	176
13.12	120	13.12	98	13.12	204	13.12	204
13.14	111	13.14	97	13.14	214	13.14	214
13.16	114	13.16	109	13.16	191	13.16	191
13.18	115	13.18	106	13.18	191	13.18	191
13.2	111	13.2	117	13.2	209	13.2	209
13.22	117	13.22	110	13.22	197	13.22	197
13.24	104	13.24	95	13.24	169	13.24	169
13.26	90	13.26	108	13.26	189	13.26	189
13.28	103	13.28	114	13.28	182	13.28	182
13.3	104	13.3	110	13.3	194	13.3	194
13.32	122	13.32	109	13.32	170	13.32	170
13.34	103	13.34	104	13.34	202	13.34	202
13.36	110	13.36	111	13.36	224	13.36	224
13.38	88	13.38	98	13.38	200	13.38	200
13.4	107	13.4	115	13.4	211	13.4	211
13.42	93	13.42	123	13.42	205	13.42	205
13.44	105	13.44	119	13.44	193	13.44	193
13.46	108	13.46	112	13.46	186	13.46	186
13.48	114	13.48	105	13.48	209	13.48	209
13.5	119	13.5	95	13.5	218	13.5	218
13.52	111	13.52	95	13.52	179	13.52	179
13.54	103	13.54	75	13.54	175	13.54	175
13.56	98	13.56	91	13.56	191	13.56	191
13.58	102	13.58	114	13.58	202	13.58	202
13.6	120	13.6	104	13.6	203	13.6	203
13.62	109	13.62	75	13.62	186	13.62	186
13.64	132	13.64	108	13.64	189	13.64	189
13.66	89	13.66	105	13.66	180	13.66	180
13.68	105	13.68	100	13.68	195	13.68	195
13.7	119	13.7	94	13.7	189	13.7	189
13.72	98	13.72	115	13.72	191	13.72	191
13.74	104	13.74	93	13.74	184	13.74	184
13.76	89	13.76	98	13.76	234	13.76	234
13.78	96	13.78	101	13.78	186	13.78	186
13.8	109	13.8	88	13.8	220	13.8	220
13.82	106	13.82	95	13.82	215	13.82	215
13.84	91	13.84	96	13.84	179	13.84	179
13.86	126	13.86	94	13.86	179	13.86	179
13.88	115	13.88	107	13.88	191	13.88	191
13.9	118	13.9	105	13.9	213	13.9	213
13.92	90	13.92	103	13.92	179	13.92	179
13.94	101	13.94	114	13.94	205	13.94	205
13.96	113	13.96	113	13.96	192	13.96	192
13.98	90	13.98	110	13.98	192	13.98	192
14	109	14	84	14	210	14	210
14.02	98	14.02	91	14.02	182	14.02	182
14.04	100	14.04	96	14.04	187	14.04	187
14.06	90	14.06	78	14.06	194	14.06	194
14.08	93	14.08	99	14.08	196	14.08	196
14.1	101	14.1	96	14.1	184	14.1	184
14.12	85	14.12	104	14.12	203	14.12	203
14.14	96	14.14	81	14.14	196	14.14	196
14.16	111	14.16	105	14.16	167	14.16	167
14.18	106	14.18	103	14.18	187	14.18	187
14.2	94	14.2	103	14.2	183	14.2	183
14.22	104	14.22	98	14.22	188	14.22	188
14.24	96	14.24	86	14.24	205	14.24	205
14.26	96	14.26	77	14.26	179	14.26	179
14.28	91	14.28	98	14.28	179	14.28	179
14.3	93	14.3	90	14.3	179	14.3	179
14.32	114	14.32	94	14.32	172	14.32	172
14.34	90	14.34	100	14.34	172	14.34	172
14.36	87	14.36	88	14.36	160	14.36	160
14.38	83	14.38	100	14.38	193	14.38	193
14.4	101	14.4	107	14.4	188	14.4	188
14.42	95	14.42	110	14.42	217	14.42	217
14.44	100	14.44	100	14.44	195	14.44	195
14.46	97	14.46	86	14.46	190	14.46	190
14.48	124	14.48	108	14.48	191	14.48	191
14.5	99	14.5	89	14.5	187	14.5	187
14.52	106	14.52	92	14.52	194	14.52	194
14.54	122	14.54	95	14.54	163	14.54	163
14.56	89	14.56	91	14.56	185	14.56	185
14.58	105	14.58	97	14.58	202	14.58	202
14.6	103	14.6	95	14.6	148	14.6	148
14.62	108	14.62	97	14.62	194	14.62	194
14.64	108	14.64	97	14.64	185	14.64	185
14.66	103	14.66	69	14.66	177	14.66	177
14.68	100	14.68	85	14.68	170	14.68	170
14.7	124	14.7	110	14.7	177	14.7	177
14.72	81	14.72	108	14.72	170	14.72	170
14.74	91	14.74	101	14.74	183	14.74	183
14.76	94	14.76	84	14.76	184	14.76	184
14.78	99	14.78	94	14.78	164	14.78	164
14.8	109	14.8	104	14.8	172	14.8	172
14.82	92	14.82	92	14.82	194	14.82	194
14.84	85	14.84	74	14.84	173	14.84	173
14.86	94	14.86	98	14.86	197	14.86	197
14.88	103	14.88	91	14.88	203	14.88	203
14.9	92	14.9	86	14.9	202	14.9	202
14.92	76	14.92	86	14.92	191	14.92	191
14.94	99	14.94	86	14.94	189	14.94	189
14.96	81	14.96	93	14.96	205	14.96	205
14.98	84	14.98	99	14.98	166	14.98	166
15	95	15	85	15	194	15	194
15.02	95	15.02	99	15.02	190	15.02	190
15.04	95	15.04	75	15.04	168	15.04	168
15.06	93	15.06	81	15.06	186	15.06	186
15.08	90	15.08	93	15.08	178	15.08	178
15.1	105	15.1	115	15.1	181	15.1	181
15.12	111	15.12	119	15.12	192	15.12	192
15.14	94	15.14	89	15.14	162	15.14	162
15.16	80	15.16	113	15.16	217	15.16	217
15.18	102	15.18	107	15.18	185	15.18	185
15.2	86	15.2	106	15.2	162	15.2	162
15.22	108	15.22	112	15.22	184	15.22	184
15.24	105	15.24	129	15.24	169	15.24	169
15.26	105	15.26	111	15.26	188	15.26	188
15.28	112	15.28	137	15.28	183	15.28	183
15.3	97	15.3	136	15.3	188	15.3	188
15.32	135	15.32	161	15.32	184	15.32	184
15.34	119	15.34	162	15.34	174	15.34	174
15.36	122	15.36	192	15.36	177	15.36	177
15.38	144	15.38	187	15.38	170	15.38	170
15.4	173	15.4	224	15.4	173	15.4	173
15.42	147	15.42	260	15.42	170	15.42	170
15.44	157	15.44	296	15.44	189	15.44	189
15.46	156	15.46	331	15.46	197	15.46	197
15.48	143	15.48	289	15.48	196	15.48	196
15.5	150	15.5	273	15.5	182	15.5	182
15.52	152	15.52	282	15.52	185	15.52	185
15.54	130	15.54	257	15.54	187	15.54	187
15.56	138	15.56	229	15.56	179	15.56	179
15.58	151	15.58	221	15.58	185	15.58	185
15.6	197	15.6	161	15.6	174	15.6	174
15.62	170	15.62	157	15.62	181	15.62	181
15.64	132	15.64	131	15.64	184	15.64	184
15.66	115	15.66	128	15.66	171	15.66	171
15.68	104	15.68	138	15.68	179	15.68	179
15.7	92	15.7	135	15.7	160	15.7	160
15.72	98	15.72	121	15.72	192	15.72	192
15.74	103	15.74	99	15.74	178	15.74	178
15.76	80	15.76	97	15.76	182	15.76	182
15.78	99	15.78	95	15.78	200	15.78	200
15.8	88	15.8	94	15.8	172	15.8	172
15.82	102	15.82	103	15.82	179	15.82	179
15.84	90	15.84	83	15.84	180	15.84	180
15.86	104	15.86	89	15.86	170	15.86	170
15.88	83	15.88	97	15.88	181	15.88	181
15.9	75	15.9	82	15.9	200	15.9	200
15.92	111	15.92	89	15.92	186	15.92	186
15.94	83	15.94	84	15.94	186	15.94	186
15.96	99	15.96	92	15.96	192	15.96	192
15.98	95	15.98	78	15.98	175	15.98	175
16	91	16	81	16	163	16	163
16.02	92	16.02	89	16.02	177	16.02	177
16.04	91	16.04	94	16.04	173	16.04	173
16.06	107	16.06	91	16.06	190	16.06	190
16.08	94	16.08	94	16.08	187	16.08	187
16.1	95	16.1	81	16.1	186	16.1	186
16.12	89	16.12	78	16.12	174	16.12	174
16.14	96	16.14	72	16.14	192	16.14	192
16.16	80	16.16	103	16.16	164	16.16	164
16.18	99	16.18	82	16.18	171	16.18	171
16.2	102	16.2	81	16.2	197	16.2	197
16.22	95	16.22	88	16.22	180	16.22	180
16.24	77	16.24	87	16.24	185	16.24	185
16.26	89	16.26	75	16.26	174	16.26	174
16.28	90	16.28	90	16.28	184	16.28	184
16.3	92	16.3	72	16.3	180	16.3	180
16.32	85	16.32	97	16.32	163	16.32	163
16.34	78	16.34	102	16.34	177	16.34	177
16.36	105	16.36	77	16.36	172	16.36	172
16.38	91	16.38	91	16.38	162	16.38	162
16.4	103	16.4	92	16.4	164	16.4	164
16.42	95	16.42	72	16.42	187	16.42	187
16.44	66	16.44	72	16.44	199	16.44	199
16.46	97	16.46	82	16.46	191	16.46	191
16.48	91	16.48	78	16.48	151	16.48	151
16.5	88	16.5	75	16.5	179	16.5	179
16.52	88	16.52	73	16.52	158	16.52	158
16.54	89	16.54	86	16.54	155	16.54	155
16.56	85	16.56	75	16.56	196	16.56	196
16.58	97	16.58	79	16.58	171	16.58	171
16.6	93	16.6	68	16.6	182	16.6	182
16.62	113	16.62	86	16.62	180	16.62	180
16.64	107	16.64	97	16.64	167	16.64	167
16.66	88	16.66	83	16.66	168	16.66	168
16.68	92	16.68	70	16.68	194	16.68	194
16.7	86	16.7	80	16.7	169	16.7	169
16.72	79	16.72	89	16.72	172	16.72	172
16.74	85	16.74	84	16.74	185	16.74	185
16.76	90	16.76	97	16.76	180	16.76	180
16.78	87	16.78	98	16.78	201	16.78	201
16.8	76	16.8	68	16.8	179	16.8	179
16.82	93	16.82	79	16.82	156	16.82	156
16.84	94	16.84	76	16.84	185	16.84	185
16.86	88	16.86	86	16.86	164	16.86	164
16.88	78	16.88	90	16.88	181	16.88	181
16.9	73	16.9	87	16.9	179	16.9	179
16.92	77	16.92	88	16.92	168	16.92	168
16.94	86	16.94	80	16.94	199	16.94	199
16.96	84	16.96	87	16.96	184	16.96	184
16.98	84	16.98	79	16.98	193	16.98	193
17	106	17	78	17	175	17	175
17.02	91	17.02	67	17.02	190	17.02	190
17.04	93	17.04	82	17.04	192	17.04	192
17.06	93	17.06	78	17.06	180	17.06	180
17.08	88	17.08	80	17.08	178	17.08	178
17.1	102	17.1	84	17.1	186	17.1	186
17.12	93	17.12	81	17.12	192	17.12	192
17.14	94	17.14	71	17.14	186	17.14	186
17.16	92	17.16	78	17.16	188	17.16	188
17.18	74	17.18	66	17.18	165	17.18	165
17.2	81	17.2	80	17.2	178	17.2	178
17.22	89	17.22	81	17.22	182	17.22	182
17.24	88	17.24	71	17.24	169	17.24	169
17.26	79	17.26	89	17.26	176	17.26	176
17.28	93	17.28	91	17.28	167	17.28	167
17.3	69	17.3	84	17.3	176	17.3	176
17.32	92	17.32	90	17.32	201	17.32	201
17.34	85	17.34	79	17.34	160	17.34	160
17.36	84	17.36	69	17.36	210	17.36	210
17.38	102	17.38	94	17.38	189	17.38	189
17.4	88	17.4	75	17.4	170	17.4	170
17.42	80	17.42	81	17.42	185	17.42	185
17.44	85	17.44	92	17.44	193	17.44	193
17.46	90	17.46	88	17.46	186	17.46	186
17.48	95	17.48	78	17.48	191	17.48	191
17.5	99	17.5	75	17.5	173	17.5	173
17.52	97	17.52	89	17.52	189	17.52	189
17.54	95	17.54	69	17.54	155	17.54	155
17.56	96	17.56	86	17.56	183	17.56	183
17.58	108	17.58	72	17.58	169	17.58	169
17.6	99	17.6	81	17.6	161	17.6	161
17.62	99	17.62	90	17.62	170	17.62	170
17.64	100	17.64	91	17.64	166	17.64	166
17.66	79	17.66	72	17.66	188	17.66	188
17.68	88	17.68	73	17.68	165	17.68	165
17.7	90	17.7	75	17.7	156	17.7	156
17.72	83	17.72	74	17.72	180	17.72	180
17.74	94	17.74	84	17.74	199	17.74	199
17.76	76	17.76	89	17.76	173	17.76	173
17.78	93	17.78	71	17.78	172	17.78	172
17.8	83	17.8	83	17.8	173	17.8	173
17.82	92	17.82	69	17.82	192	17.82	192
17.84	97	17.84	67	17.84	193	17.84	193
17.86	78	17.86	87	17.86	182	17.86	182
17.88	75	17.88	90	17.88	173	17.88	173
17.9	99	17.9	77	17.9	180	17.9	180
17.92	83	17.92	83	17.92	169	17.92	169
17.94	76	17.94	80	17.94	174	17.94	174
17.96	96	17.96	71	17.96	161	17.96	161
17.98	100	17.98	83	17.98	181	17.98	181
18	89	18	81	18	190	18	190
18.02	86	18.02	74	18.02	201	18.02	201
18.04	86	18.04	69	18.04	184	18.04	184
18.06	83	18.06	97	18.06	162	18.06	162
18.08	95	18.08	85	18.08	168	18.08	168
18.1	89	18.1	87	18.1	206	18.1	206
18.12	87	18.12	82	18.12	192	18.12	192
18.14	74	18.14	76	18.14	151	18.14	151
18.16	76	18.16	81	18.16	195	18.16	195
18.18	82	18.18	97	18.18	196	18.18	196
18.2	78	18.2	87	18.2	141	18.2	141
18.22	89	18.22	85	18.22	175	18.22	175
18.24	73	18.24	74	18.24	186	18.24	186
18.26	82	18.26	93	18.26	169	18.26	169
18.28	87	18.28	84	18.28	172	18.28	172
18.3	91	18.3	76	18.3	179	18.3	179
18.32	94	18.32	84	18.32	162	18.32	162
18.34	98	18.34	86	18.34	185	18.34	185
18.36	101	18.36	90	18.36	183	18.36	183
18.38	82	18.38	95	18.38	184	18.38	184
18.4	94	18.4	87	18.4	151	18.4	151
18.42	100	18.42	68	18.42	179	18.42	179
18.44	90	18.44	95	18.44	176	18.44	176
18.46	95	18.46	108	18.46	198	18.46	198
18.48	110	18.48	104	18.48	187	18.48	187
18.5	103	18.5	84	18.5	174	18.5	174
18.52	100	18.52	112	18.52	172	18.52	172
18.54	91	18.54	107	18.54	186	18.54	186
18.56	104	18.56	107	18.56	173	18.56	173
18.58	101	18.58	115	18.58	199	18.58	199
18.6	84	18.6	89	18.6	182	18.6	182
18.62	98	18.62	93	18.62	184	18.62	184
18.64	86	18.64	91	18.64	180	18.64	180
18.66	86	18.66	98	18.66	159	18.66	159
18.68	99	18.68	86	18.68	200	18.68	200
18.7	82	18.7	98	18.7	178	18.7	178
18.72	89	18.72	88	18.72	187	18.72	187
18.74	81	18.74	79	18.74	175	18.74	175
18.76	82	18.76	81	18.76	186	18.76	186
18.78	90	18.78	81	18.78	178	18.78	178
18.8	77	18.8	67	18.8	184	18.8	184
18.82	102	18.82	79	18.82	182	18.82	182
18.84	90	18.84	83	18.84	175	18.84	175
18.86	99	18.86	85	18.86	188	18.86	188
18.88	100	18.88	83	18.88	185	18.88	185
18.9	89	18.9	64	18.9	187	18.9	187
18.92	89	18.92	84	18.92	176	18.92	176
18.94	88	18.94	84	18.94	166	18.94	166
18.96	90	18.96	82	18.96	175	18.96	175
18.98	92	18.98	67	18.98	165	18.98	165
19	98	19	92	19	195	19	195
19.02	85	19.02	74	19.02	188	19.02	188
19.04	105	19.04	80	19.04	158	19.04	158
19.06	99	19.06	79	19.06	155	19.06	155
19.08	95	19.08	75	19.08	182	19.08	182
19.1	98	19.1	84	19.1	188	19.1	188
19.12	85	19.12	84	19.12	177	19.12	177
19.14	92	19.14	70	19.14	175	19.14	175
19.16	88	19.16	74	19.16	178	19.16	178
19.18	102	19.18	78	19.18	174	19.18	174
19.2	98	19.2	78	19.2	179	19.2	179
19.22	94	19.22	82	19.22	195	19.22	195
19.24	101	19.24	82	19.24	159	19.24	159
19.26	92	19.26	97	19.26	167	19.26	167
19.28	85	19.28	75	19.28	174	19.28	174
19.3	88	19.3	70	19.3	177	19.3	177
19.32	93	19.32	70	19.32	186	19.32	186
19.34	85	19.34	89	19.34	171	19.34	171
19.36	92	19.36	66	19.36	207	19.36	207
19.38	90	19.38	85	19.38	185	19.38	185
19.4	79	19.4	89	19.4	183	19.4	183
19.42	95	19.42	77	19.42	168	19.42	168
19.44	75	19.44	72	19.44	176	19.44	176
19.46	86	19.46	82	19.46	187	19.46	187
19.48	111	19.48	91	19.48	186	19.48	186
19.5	95	19.5	84	19.5	174	19.5	174
19.52	92	19.52	73	19.52	166	19.52	166
19.54	92	19.54	73	19.54	175	19.54	175
19.56	89	19.56	90	19.56	184	19.56	184
19.58	85	19.58	106	19.58	174	19.58	174
19.6	90	19.6	87	19.6	183	19.6	183
19.62	95	19.62	70	19.62	168	19.62	168
19.64	85	19.64	63	19.64	199	19.64	199
19.66	98	19.66	90	19.66	187	19.66	187
19.68	90	19.68	87	19.68	189	19.68	189
19.7	88	19.7	89	19.7	189	19.7	189
19.72	92	19.72	88	19.72	177	19.72	177
19.74	112	19.74	82	19.74	181	19.74	181
19.76	104	19.76	66	19.76	189	19.76	189
19.78	104	19.78	88	19.78	195	19.78	195
19.8	103	19.8	87	19.8	194	19.8	194
19.82	104	19.82	99	19.82	186	19.82	186
19.84	107	19.84	84	19.84	159	19.84	159
19.86	100	19.86	85	19.86	197	19.86	197
19.88	80	19.88	65	19.88	191	19.88	191
19.9	98	19.9	74	19.9	193	19.9	193
19.92	78	19.92	85	19.92	178	19.92	178
19.94	101	19.94	71	19.94	192	19.94	192
19.96	92	19.96	74	19.96	163	19.96	163
19.98	95	19.98	100	19.98	208	19.98	208
20	106	20	105	20	191	20	191
20.02	94	20.02	96	20.02	160	20.02	160
20.04	105	20.04	83	20.04	186	20.04	186
20.06	95	20.06	81	20.06	169	20.06	169
20.08	77	20.08	77	20.08	177	20.08	177
20.1	115	20.1	82	20.1	182	20.1	182
20.12	91	20.12	74	20.12	195	20.12	195
20.14	105	20.14	81	20.14	180	20.14	180
20.16	89	20.16	75	20.16	167	20.16	167
20.18	93	20.18	81	20.18	180	20.18	180
20.2	99	20.2	83	20.2	196	20.2	196
20.22	105	20.22	91	20.22	198	20.22	198
20.24	83	20.24	90	20.24	189	20.24	189
20.26	85	20.26	72	20.26	184	20.26	184
20.28	98	20.28	77	20.28	158	20.28	158
20.3	103	20.3	82	20.3	190	20.3	190
20.32	102	20.32	86	20.32	185	20.32	185
20.34	108	20.34	95	20.34	182	20.34	182
20.36	100	20.36	100	20.36	194	20.36	194
20.38	94	20.38	75	20.38	194	20.38	194
20.4	108	20.4	80	20.4	202	20.4	202
20.42	104	20.42	85	20.42	169	20.42	169
20.44	106	20.44	83	20.44	183	20.44	183
20.46	93	20.46	85	20.46	200	20.46	200
20.48	101	20.48	83	20.48	207	20.48	207
20.5	107	20.5	85	20.5	166	20.5	166
20.52	91	20.52	85	20.52	189	20.52	189
20.54	97	20.54	92	20.54	201	20.54	201
20.56	108	20.56	78	20.56	161	20.56	161
20.58	84	20.58	87	20.58	188	20.58	188
20.6	96	20.6	123	20.6	190	20.6	190
20.62	93	20.62	75	20.62	181	20.62	181
20.64	80	20.64	86	20.64	201	20.64	201
20.66	78	20.66	86	20.66	205	20.66	205
20.68	91	20.68	87	20.68	181	20.68	181
20.7	117	20.7	81	20.7	176	20.7	176
20.72	92	20.72	106	20.72	180	20.72	180
20.74	77	20.74	100	20.74	211	20.74	211
20.76	114	20.76	89	20.76	200	20.76	200
20.78	115	20.78	96	20.78	192	20.78	192
20.8	99	20.8	94	20.8	182	20.8	182
20.82	92	20.82	123	20.82	209	20.82	209
20.84	103	20.84	92	20.84	201	20.84	201
20.86	111	20.86	102	20.86	196	20.86	196
20.88	121	20.88	109	20.88	194	20.88	194
20.9	109	20.9	100	20.9	176	20.9	176
20.92	103	20.92	120	20.92	174	20.92	174
20.94	103	20.94	108	20.94	188	20.94	188
20.96	112	20.96	89	20.96	187	20.96	187
20.98	102	20.98	112	20.98	198	20.98	198
21	96	21	97	21	195	21	195
21.02	102	21.02	98	21.02	191	21.02	191
21.04	91	21.04	95	21.04	184	21.04	184
21.06	102	21.06	119	21.06	188	21.06	188
21.08	102	21.08	96	21.08	185	21.08	185
21.1	111	21.1	100	21.1	203	21.1	203
21.12	99	21.12	99	21.12	195	21.12	195
21.14	103	21.14	106	21.14	203	21.14	203
21.16	96	21.16	109	21.16	201	21.16	201
21.18	102	21.18	114	21.18	208	21.18	208
21.2	101	21.2	125	21.2	176	21.2	176
21.22	93	21.22	113	21.22	191	21.22	191
21.24	114	21.24	135	21.24	192	21.24	192
21.26	109	21.26	125	21.26	189	21.26	189
21.28	120	21.28	113	21.28	211	21.28	211
21.3	119	21.3	133	21.3	181	21.3	181
21.32	108	21.32	128	21.32	189	21.32	189
21.34	91	21.34	139	21.34	183	21.34	183
21.36	102	21.36	106	21.36	183	21.36	183
21.38	100	21.38	103	21.38	179	21.38	179
21.4	99	21.4	89	21.4	210	21.4	210
21.42	112	21.42	89	21.42	185	21.42	185
21.44	102	21.44	89	21.44	183	21.44	183
21.46	115	21.46	90	21.46	209	21.46	209
21.48	103	21.48	102	21.48	222	21.48	222
21.5	94	21.5	101	21.5	207	21.5	207
21.52	93	21.52	105	21.52	203	21.52	203
21.54	107	21.54	102	21.54	186	21.54	186
21.56	96	21.56	92	21.56	201	21.56	201
21.58	118	21.58	81	21.58	180	21.58	180
21.6	82	21.6	97	21.6	184	21.6	184
21.62	86	21.62	90	21.62	200	21.62	200
21.64	104	21.64	108	21.64	240	21.64	240
21.66	125	21.66	96	21.66	200	21.66	200
21.68	114	21.68	113	21.68	219	21.68	219
21.7	113	21.7	130	21.7	201	21.7	201
21.72	108	21.72	137	21.72	219	21.72	219
21.74	108	21.74	166	21.74	206	21.74	206
21.76	129	21.76	138	21.76	224	21.76	224
21.78	142	21.78	179	21.78	215	21.78	215
21.8	155	21.8	216	21.8	183	21.8	183
21.82	152	21.82	199	21.82	212	21.82	212
21.84	151	21.84	248	21.84	209	21.84	209
21.86	159	21.86	300	21.86	192	21.86	192
21.88	192	21.88	351	21.88	201	21.88	201
21.9	179	21.9	433	21.9	189	21.9	189
21.92	179	21.92	404	21.92	193	21.92	193
21.94	162	21.94	468	21.94	196	21.94	196
21.96	176	21.96	540	21.96	205	21.96	205
21.98	167	21.98	509	21.98	187	21.98	187
22	148	22	462	22	178	22	178
22.02	147	22.02	443	22.02	190	22.02	190
22.04	127	22.04	417	22.04	220	22.04	220
22.06	131	22.06	401	22.06	185	22.06	185
22.08	137	22.08	270	22.08	205	22.08	205
22.1	125	22.1	227	22.1	194	22.1	194
22.12	107	22.12	182	22.12	216	22.12	216
22.14	110	22.14	143	22.14	185	22.14	185
22.16	118	22.16	132	22.16	205	22.16	205
22.18	97	22.18	111	22.18	207	22.18	207
22.2	119	22.2	98	22.2	187	22.2	187
22.22	101	22.22	123	22.22	227	22.22	227
22.24	97	22.24	115	22.24	204	22.24	204
22.26	100	22.26	116	22.26	197	22.26	197
22.28	123	22.28	115	22.28	199	22.28	199
22.3	129	22.3	120	22.3	209	22.3	209
22.32	124	22.32	111	22.32	213	22.32	213
22.34	104	22.34	132	22.34	198	22.34	198
22.36	119	22.36	112	22.36	202	22.36	202
22.38	124	22.38	126	22.38	214	22.38	214
22.4	103	22.4	130	22.4	193	22.4	193
22.42	105	22.42	131	22.42	212	22.42	212
22.44	136	22.44	120	22.44	210	22.44	210
22.46	120	22.46	135	22.46	184	22.46	184
22.48	126	22.48	138	22.48	195	22.48	195
22.5	128	22.5	114	22.5	206	22.5	206
22.52	128	22.52	139	22.52	183	22.52	183
22.54	132	22.54	147	22.54	217	22.54	217
22.56	131	22.56	144	22.56	199	22.56	199
22.58	121	22.58	167	22.58	207	22.58	207
22.6	121	22.6	177	22.6	203	22.6	203
22.62	150	22.62	213	22.62	202	22.62	202
22.64	144	22.64	203	22.64	205	22.64	205
22.66	179	22.66	215	22.66	186	22.66	186
22.68	178	22.68	212	22.68	220	22.68	220
22.7	203	22.7	230	22.7	222	22.7	222
22.72	186	22.72	266	22.72	242	22.72	242
22.74	204	22.74	316	22.74	194	22.74	194
22.76	191	22.76	337	22.76	220	22.76	220
22.78	208	22.78	413	22.78	205	22.78	205
22.8	229	22.8	345	22.8	221	22.8	221
22.82	223	22.82	385	22.82	204	22.82	204
22.84	222	22.84	369	22.84	200	22.84	200
22.86	246	22.86	350	22.86	213	22.86	213
22.88	288	22.88	345	22.88	176	22.88	176
22.9	257	22.9	362	22.9	197	22.9	197
22.92	321	22.92	369	22.92	226	22.92	226
22.94	370	22.94	483	22.94	189	22.94	189
22.96	392	22.96	564	22.96	208	22.96	208
22.98	381	22.98	775	22.98	217	22.98	217
23	420	23	945	23	225	23	225
23.02	483	23.02	1121	23.02	215	23.02	215
23.04	595	23.04	1630	23.04	207	23.04	207
23.06	701	23.06	2131	23.06	213	23.06	213
23.08	830	23.08	2574	23.08	192	23.08	192
23.1	859	23.1	2879	23.1	194	23.1	194
23.12	898	23.12	3471	23.12	234	23.12	234
23.14	800	23.14	3313	23.14	235	23.14	235
23.16	685	23.16	3156	23.16	225	23.16	225
23.18	539	23.18	3343	23.18	213	23.18	213
23.2	413	23.2	3087	23.2	219	23.2	219
23.22	365	23.22	2565	23.22	197	23.22	197
23.24	307	23.24	2300	23.24	233	23.24	233
23.26	271	23.26	1688	23.26	213	23.26	213
23.28	216	23.28	1069	23.28	207	23.28	207
23.3	208	23.3	803	23.3	196	23.3	196
23.32	181	23.32	523	23.32	227	23.32	227
23.34	133	23.34	283	23.34	202	23.34	202
23.36	136	23.36	223	23.36	210	23.36	210
23.38	116	23.38	202	23.38	207	23.38	207
23.4	110	23.4	184	23.4	223	23.4	223
23.42	139	23.42	168	23.42	226	23.42	226
23.44	106	23.44	140	23.44	194	23.44	194
23.46	131	23.46	138	23.46	223	23.46	223
23.48	120	23.48	125	23.48	206	23.48	206
23.5	145	23.5	159	23.5	203	23.5	203
23.52	123	23.52	116	23.52	214	23.52	214
23.54	127	23.54	123	23.54	188	23.54	188
23.56	134	23.56	124	23.56	205	23.56	205
23.58	119	23.58	133	23.58	204	23.58	204
23.6	120	23.6	126	23.6	205	23.6	205
23.62	127	23.62	123	23.62	233	23.62	233
23.64	123	23.64	125	23.64	218	23.64	218
23.66	127	23.66	143	23.66	226	23.66	226
23.68	115	23.68	114	23.68	226	23.68	226
23.7	130	23.7	137	23.7	221	23.7	221
23.72	137	23.72	109	23.72	208	23.72	208
23.74	111	23.74	131	23.74	203	23.74	203
23.76	106	23.76	108	23.76	208	23.76	208
23.78	105	23.78	117	23.78	184	23.78	184
23.8	117	23.8	124	23.8	216	23.8	216
23.82	107	23.82	120	23.82	198	23.82	198
23.84	107	23.84	111	23.84	232	23.84	232
23.86	116	23.86	135	23.86	198	23.86	198
23.88	109	23.88	117	23.88	219	23.88	219
23.9	107	23.9	110	23.9	240	23.9	240
23.92	105	23.92	115	23.92	214	23.92	214
23.94	97	23.94	119	23.94	204	23.94	204
23.96	124	23.96	116	23.96	233	23.96	233
23.98	109	23.98	125	23.98	205	23.98	205
24	121	24	125	24	190	24	190
24.02	121	24.02	115	24.02	231	24.02	231
24.04	117	24.04	95	24.04	196	24.04	196
24.06	129	24.06	105	24.06	226	24.06	226
24.08	112	24.08	128	24.08	192	24.08	192
24.1	126	24.1	130	24.1	217	24.1	217
24.12	134	24.12	132	24.12	204	24.12	204
24.14	111	24.14	111	24.14	246	24.14	246
24.16	122	24.16	142	24.16	198	24.16	198
24.18	110	24.18	117	24.18	223	24.18	223
24.2	128	24.2	130	24.2	215	24.2	215
24.22	125	24.22	106	24.22	204	24.22	204
24.24	110	24.24	124	24.24	239	24.24	239
24.26	115	24.26	117	24.26	208	24.26	208
24.28	130	24.28	121	24.28	238	24.28	238
24.3	110	24.3	121	24.3	232	24.3	232
24.32	107	24.32	101	24.32	196	24.32	196
24.34	122	24.34	140	24.34	194	24.34	194
24.36	120	24.36	118	24.36	225	24.36	225
24.38	131	24.38	124	24.38	197	24.38	197
24.4	122	24.4	134	24.4	215	24.4	215
24.42	121	24.42	118	24.42	235	24.42	235
24.44	126	24.44	117	24.44	207	24.44	207
24.46	141	24.46	108	24.46	187	24.46	187
24.48	134	24.48	96	24.48	203	24.48	203
24.5	116	24.5	107	24.5	217	24.5	217
24.52	122	24.52	106	24.52	201	24.52	201
24.54	120	24.54	97	24.54	204	24.54	204
24.56	121	24.56	132	24.56	217	24.56	217
24.58	112	24.58	126	24.58	208	24.58	208
24.6	117	24.6	118	24.6	210	24.6	210
24.62	108	24.62	123	24.62	200	24.62	200
24.64	117	24.64	104	24.64	198	24.64	198
24.66	102	24.66	112	24.66	232	24.66	232
24.68	121	24.68	137	24.68	205	24.68	205
24.7	108	24.7	134	24.7	197	24.7	197
24.72	116	24.72	118	24.72	210	24.72	210
24.74	108	24.74	96	24.74	232	24.74	232
24.76	119	24.76	116	24.76	238	24.76	238
24.78	117	24.78	133	24.78	193	24.78	193
24.8	110	24.8	151	24.8	195	24.8	195
24.82	122	24.82	152	24.82	171	24.82	171
24.84	140	24.84	175	24.84	210	24.84	210
24.86	139	24.86	181	24.86	207	24.86	207
24.88	141	24.88	190	24.88	201	24.88	201
24.9	120	24.9	167	24.9	203	24.9	203
24.92	140	24.92	194	24.92	199	24.92	199
24.94	150	24.94	190	24.94	204	24.94	204
24.96	164	24.96	223	24.96	230	24.96	230
24.98	168	24.98	212	24.98	217	24.98	217
25	171	25	245	25	207	25	207
25.02	156	25.02	227	25.02	214	25.02	214
25.04	137	25.04	228	25.04	204	25.04	204
25.06	146	25.06	228	25.06	220	25.06	220
25.08	158	25.08	237	25.08	241	25.08	241
25.1	140	25.1	259	25.1	188	25.1	188
25.12	151	25.12	191	25.12	204	25.12	204
25.14	123	25.14	168	25.14	201	25.14	201
25.16	117	25.16	170	25.16	218	25.16	218
25.18	108	25.18	149	25.18	216	25.18	216
25.2	115	25.2	124	25.2	212	25.2	212
25.22	107	25.22	128	25.22	196	25.22	196
25.24	130	25.24	119	25.24	227	25.24	227
25.26	99	25.26	126	25.26	188	25.26	188
25.28	111	25.28	121	25.28	175	25.28	175
25.3	127	25.3	108	25.3	204	25.3	204
25.32	121	25.32	119	25.32	210	25.32	210
25.34	107	25.34	132	25.34	213	25.34	213
25.36	129	25.36	107	25.36	199	25.36	199
25.38	135	25.38	100	25.38	204	25.38	204
25.4	119	25.4	117	25.4	215	25.4	215
25.42	112	25.42	110	25.42	209	25.42	209
25.44	119	25.44	117	25.44	184	25.44	184
25.46	112	25.46	118	25.46	200	25.46	200
25.48	108	25.48	121	25.48	171	25.48	171
25.5	130	25.5	102	25.5	232	25.5	232
25.52	102	25.52	134	25.52	187	25.52	187
25.54	102	25.54	104	25.54	197	25.54	197
25.56	125	25.56	122	25.56	190	25.56	190
25.58	106	25.58	146	25.58	205	25.58	205
25.6	117	25.6	118	25.6	198	25.6	198
25.62	128	25.62	120	25.62	210	25.62	210
25.64	102	25.64	136	25.64	199	25.64	199
25.66	111	25.66	147	25.66	197	25.66	197
25.68	121	25.68	144	25.68	208	25.68	208
25.7	113	25.7	178	25.7	207	25.7	207
25.72	128	25.72	162	25.72	214	25.72	214
25.74	116	25.74	194	25.74	211	25.74	211
25.76	123	25.76	237	25.76	209	25.76	209
25.78	131	25.78	267	25.78	207	25.78	207
25.8	159	25.8	349	25.8	185	25.8	185
25.82	189	25.82	463	25.82	207	25.82	207
25.84	209	25.84	539	25.84	200	25.84	200
25.86	224	25.86	502	25.86	195	25.86	195
25.88	222	25.88	607	25.88	191	25.88	191
25.9	247	25.9	702	25.9	210	25.9	210
25.92	249	25.92	682	25.92	187	25.92	187
25.94	211	25.94	623	25.94	198	25.94	198
25.96	195	25.96	551	25.96	209	25.96	209
25.98	187	25.98	543	25.98	200	25.98	200
26	161	26	423	26	191	26	191
26.02	139	26.02	359	26.02	205	26.02	205
26.04	113	26.04	256	26.04	188	26.04	188
26.06	129	26.06	194	26.06	179	26.06	179
26.08	116	26.08	195	26.08	192	26.08	192
26.1	121	26.1	146	26.1	176	26.1	176
26.12	105	26.12	143	26.12	205	26.12	205
26.14	113	26.14	127	26.14	191	26.14	191
26.16	102	26.16	130	26.16	200	26.16	200
26.18	117	26.18	120	26.18	183	26.18	183
26.2	116	26.2	131	26.2	204	26.2	204
26.22	108	26.22	125	26.22	190	26.22	190
26.24	127	26.24	132	26.24	184	26.24	184
26.26	111	26.26	134	26.26	172	26.26	172
26.28	115	26.28	123	26.28	180	26.28	180
26.3	121	26.3	182	26.3	202	26.3	202
26.32	132	26.32	169	26.32	180	26.32	180
26.34	124	26.34	186	26.34	155	26.34	155
26.36	105	26.36	191	26.36	175	26.36	175
26.38	130	26.38	191	26.38	192	26.38	192
26.4	143	26.4	209	26.4	181	26.4	181
26.42	122	26.42	178	26.42	171	26.42	171
26.44	113	26.44	192	26.44	174	26.44	174
26.46	112	26.46	201	26.46	195	26.46	195
26.48	132	26.48	197	26.48	174	26.48	174
26.5	125	26.5	179	26.5	188	26.5	188
26.52	114	26.52	193	26.52	170	26.52	170
26.54	111	26.54	190	26.54	177	26.54	177
26.56	107	26.56	176	26.56	195	26.56	195
26.58	133	26.58	232	26.58	186	26.58	186
26.6	162	26.6	275	26.6	164	26.6	164
26.62	130	26.62	337	26.62	197	26.62	197
26.64	167	26.64	375	26.64	193	26.64	193
26.66	210	26.66	456	26.66	167	26.66	167
26.68	260	26.68	545	26.68	178	26.68	178
26.7	304	26.7	669	26.7	188	26.7	188
26.72	309	26.72	716	26.72	192	26.72	192
26.74	317	26.74	762	26.74	174	26.74	174
26.76	339	26.76	762	26.76	174	26.76	174
26.78	330	26.78	778	26.78	205	26.78	205
26.8	279	26.8	739	26.8	157	26.8	157
26.82	288	26.82	774	26.82	165	26.82	165
26.84	218	26.84	709	26.84	166	26.84	166
26.86	187	26.86	653	26.86	175	26.86	175
26.88	169	26.88	608	26.88	167	26.88	167
26.9	128	26.9	501	26.9	178	26.9	178
26.92	132	26.92	367	26.92	165	26.92	165
26.94	130	26.94	308	26.94	175	26.94	175
26.96	117	26.96	240	26.96	182	26.96	182
26.98	94	26.98	165	26.98	156	26.98	156
27	92	27	134	27	141	27	141
27.02	94	27.02	119	27.02	180	27.02	180
27.04	90	27.04	133	27.04	162	27.04	162
27.06	104	27.06	110	27.06	183	27.06	183
27.08	95	27.08	114	27.08	182	27.08	182
27.1	100	27.1	121	27.1	152	27.1	152
27.12	110	27.12	135	27.12	152	27.12	152
27.14	110	27.14	115	27.14	147	27.14	147
27.16	100	27.16	114	27.16	160	27.16	160
27.18	103	27.18	112	27.18	166	27.18	166
27.2	103	27.2	129	27.2	189	27.2	189
27.22	111	27.22	110	27.22	158	27.22	158
27.24	101	27.24	114	27.24	148	27.24	148
27.26	91	27.26	104	27.26	175	27.26	175
27.28	105	27.28	110	27.28	156	27.28	156
27.3	88	27.3	94	27.3	156	27.3	156
27.32	96	27.32	128	27.32	183	27.32	183
27.34	83	27.34	121	27.34	143	27.34	143
27.36	87	27.36	119	27.36	162	27.36	162
27.38	98	27.38	114	27.38	174	27.38	174
27.4	95	27.4	136	27.4	154	27.4	154
27.42	100	27.42	95	27.42	173	27.42	173
27.44	89	27.44	109	27.44	152	27.44	152
27.46	101	27.46	126	27.46	165	27.46	165
27.48	109	27.48	133	27.48	157	27.48	157
27.5	72	27.5	134	27.5	161	27.5	161
27.52	98	27.52	160	27.52	149	27.52	149
27.54	100	27.54	158	27.54	142	27.54	142
27.56	110	27.56	169	27.56	149	27.56	149
27.58	114	27.58	188	27.58	172	27.58	172
27.6	131	27.6	217	27.6	162	27.6	162
27.62	140	27.62	228	27.62	145	27.62	145
27.64	142	27.64	296	27.64	138	27.64	138
27.66	193	27.66	367	27.66	145	27.66	145
27.68	227	27.68	474	27.68	138	27.68	138
27.7	262	27.7	628	27.7	137	27.7	137
27.72	335	27.72	893	27.72	137	27.72	137
27.74	322	27.74	1112	27.74	144	27.74	144
27.76	312	27.76	1141	27.76	176	27.76	176
27.78	312	27.78	1167	27.78	145	27.78	145
27.8	311	27.8	1153	27.8	163	27.8	163
27.82	265	27.82	1053	27.82	160	27.82	160
27.84	265	27.84	1009	27.84	159	27.84	159
27.86	214	27.86	794	27.86	136	27.86	136
27.88	205	27.88	663	27.88	150	27.88	150
27.9	201	27.9	546	27.9	144	27.9	144
27.92	184	27.92	389	27.92	138	27.92	138
27.94	149	27.94	299	27.94	150	27.94	150
27.96	125	27.96	223	27.96	136	27.96	136
27.98	107	27.98	181	27.98	161	27.98	161
28	121	28	152	28	155	28	155
28.02	99	28.02	134	28.02	142	28.02	142
28.04	121	28.04	119	28.04	150	28.04	150
28.06	84	28.06	118	28.06	126	28.06	126
28.08	104	28.08	104	28.08	140	28.08	140
28.1	90	28.1	106	28.1	157	28.1	157
28.12	103	28.12	100	28.12	139	28.12	139
28.14	93	28.14	117	28.14	128	28.14	128
28.16	96	28.16	115	28.16	136	28.16	136
28.18	91	28.18	106	28.18	137	28.18	137
28.2	88	28.2	109	28.2	122	28.2	122
28.22	87	28.22	121	28.22	155	28.22	155
28.24	93	28.24	90	28.24	137	28.24	137
28.26	69	28.26	111	28.26	130	28.26	130
28.28	82	28.28	115	28.28	144	28.28	144
28.3	91	28.3	102	28.3	131	28.3	131
28.32	90	28.32	97	28.32	119	28.32	119
28.34	90	28.34	124	28.34	129	28.34	129
28.36	97	28.36	119	28.36	145	28.36	145
28.38	68	28.38	102	28.38	148	28.38	148
28.4	79	28.4	108	28.4	127	28.4	127
28.42	93	28.42	99	28.42	126	28.42	126
28.44	87	28.44	130	28.44	145	28.44	145
28.46	91	28.46	127	28.46	145	28.46	145
28.48	99	28.48	113	28.48	137	28.48	137
28.5	97	28.5	144	28.5	130	28.5	130
28.52	96	28.52	186	28.52	128	28.52	128
28.54	116	28.54	235	28.54	126	28.54	126
28.56	124	28.56	228	28.56	139	28.56	139
28.58	152	28.58	321	28.58	120	28.58	120
28.6	145	28.6	411	28.6	117	28.6	117
28.62	183	28.62	464	28.62	122	28.62	122
28.64	259	28.64	497	28.64	132	28.64	132
28.66	254	28.66	570	28.66	136	28.66	136
28.68	296	28.68	661	28.68	123	28.68	123
28.7	277	28.7	671	28.7	115	28.7	115
28.72	268	28.72	651	28.72	132	28.72	132
28.74	252	28.74	646	28.74	120	28.74	120
28.76	210	28.76	713	28.76	115	28.76	115
28.78	179	28.78	738	28.78	114	28.78	114
28.8	154	28.8	602	28.8	106	28.8	106
28.82	165	28.82	523	28.82	113	28.82	113
28.84	137	28.84	466	28.84	113	28.84	113
28.86	127	28.86	408	28.86	135	28.86	135
28.88	133	28.88	365	28.88	127	28.88	127
28.9	148	28.9	332	28.9	131	28.9	131
28.92	151	28.92	318	28.92	123	28.92	123
28.94	144	28.94	347	28.94	119	28.94	119
28.96	152	28.96	337	28.96	120	28.96	120
28.98	142	28.98	346	28.98	115	28.98	115
29	151	29	309	29	116	29	116
29.02	154	29.02	292	29.02	118	29.02	118
29.04	152	29.04	357	29.04	125	29.04	125
29.06	128	29.06	305	29.06	145	29.06	145
29.08	117	29.08	287	29.08	113	29.08	113
29.1	105	29.1	279	29.1	119	29.1	119
29.12	105	29.12	222	29.12	112	29.12	112
29.14	122	29.14	189	29.14	110	29.14	110
29.16	109	29.16	173	29.16	123	29.16	123
29.18	112	29.18	161	29.18	125	29.18	125
29.2	102	29.2	166	29.2	119	29.2	119
29.22	98	29.22	116	29.22	116	29.22	116
29.24	87	29.24	101	29.24	102	29.24	102
29.26	84	29.26	81	29.26	121	29.26	121
29.28	92	29.28	111	29.28	116	29.28	116
29.3	86	29.3	99	29.3	110	29.3	110
29.32	77	29.32	96	29.32	104	29.32	104
29.34	78	29.34	83	29.34	100	29.34	100
29.36	76	29.36	89	29.36	114	29.36	114
29.38	80	29.38	99	29.38	123	29.38	123
29.4	83	29.4	91	29.4	114	29.4	114
29.42	79	29.42	92	29.42	105	29.42	105
29.44	77	29.44	98	29.44	99	29.44	99
29.46	78	29.46	89	29.46	109	29.46	109
29.48	67	29.48	88	29.48	103	29.48	103
29.5	83	29.5	88	29.5	100	29.5	100
29.52	91	29.52	95	29.52	105	29.52	105
29.54	63	29.54	92	29.54	115	29.54	115
29.56	80	29.56	79	29.56	90	29.56	90
29.58	82	29.58	82	29.58	102	29.58	102
29.6	66	29.6	92	29.6	110	29.6	110
29.62	60	29.62	90	29.62	106	29.62	106
29.64	70	29.64	83	29.64	123	29.64	123
29.66	74	29.66	97	29.66	96	29.66	96
29.68	72	29.68	86	29.68	103	29.68	103
29.7	84	29.7	97	29.7	110	29.7	110
29.72	77	29.72	79	29.72	111	29.72	111
29.74	65	29.74	91	29.74	101	29.74	101
29.76	68	29.76	89	29.76	106	29.76	106
29.78	58	29.78	82	29.78	105	29.78	105
29.8	79	29.8	80	29.8	97	29.8	97
29.82	72	29.82	85	29.82	104	29.82	104
29.84	77	29.84	95	29.84	101	29.84	101
29.86	69	29.86	90	29.86	85	29.86	85
29.88	74	29.88	75	29.88	100	29.88	100
29.9	71	29.9	93	29.9	109	29.9	109
29.92	77	29.92	78	29.92	103	29.92	103
29.94	78	29.94	87	29.94	95	29.94	95
29.96	85	29.96	96	29.96	89	29.96	89
29.98	71	29.98	75	29.98	96	29.98	96
30	72	30	95	30	94	30	94
30.02	73	30.02	99	30.02	74	30.02	74
30.04	64	30.04	85	30.04	102	30.04	102
30.06	75	30.06	86	30.06	113	30.06	113
30.08	76	30.08	85	30.08	91	30.08	91
30.1	62	30.1	91	30.1	71	30.1	71
30.12	84	30.12	65	30.12	89	30.12	89
30.14	61	30.14	77	30.14	92	30.14	92
30.16	65	30.16	72	30.16	90	30.16	90
30.18	64	30.18	79	30.18	75	30.18	75
30.2	74	30.2	72	30.2	83	30.2	83
30.22	83	30.22	78	30.22	83	30.22	83
30.24	66	30.24	65	30.24	99	30.24	99
30.26	83	30.26	88	30.26	97	30.26	97
30.28	72	30.28	78	30.28	96	30.28	96
30.3	86	30.3	76	30.3	100	30.3	100
30.32	64	30.32	80	30.32	90	30.32	90
30.34	76	30.34	82	30.34	98	30.34	98
30.36	72	30.36	72	30.36	85	30.36	85
30.38	72	30.38	80	30.38	95	30.38	95
30.4	56	30.4	81	30.4	93	30.4	93
30.42	69	30.42	93	30.42	98	30.42	98
30.44	84	30.44	80	30.44	86	30.44	86
30.46	67	30.46	86	30.46	87	30.46	87
30.48	67	30.48	76	30.48	90	30.48	90
30.5	83	30.5	80	30.5	93	30.5	93
30.52	82	30.52	63	30.52	79	30.52	79
30.54	77	30.54	85	30.54	116	30.54	116
30.56	70	30.56	85	30.56	86	30.56	86
30.58	55	30.58	86	30.58	118	30.58	118
30.6	50	30.6	78	30.6	80	30.6	80
30.62	75	30.62	77	30.62	93	30.62	93
30.64	52	30.64	82	30.64	112	30.64	112
30.66	59	30.66	82	30.66	98	30.66	98
30.68	60	30.68	78	30.68	86	30.68	86
30.7	73	30.7	91	30.7	96	30.7	96
30.72	66	30.72	100	30.72	77	30.72	77
30.74	57	30.74	79	30.74	91	30.74	91
30.76	52	30.76	94	30.76	92	30.76	92
30.78	57	30.78	85	30.78	95	30.78	95
30.8	58	30.8	84	30.8	87	30.8	87
30.82	71	30.82	78	30.82	88	30.82	88
30.84	57	30.84	73	30.84	92	30.84	92
30.86	64	30.86	80	30.86	87	30.86	87
30.88	85	30.88	77	30.88	59	30.88	59
30.9	69	30.9	70	30.9	99	30.9	99
30.92	72	30.92	77	30.92	103	30.92	103
30.94	63	30.94	86	30.94	86	30.94	86
30.96	64	30.96	79	30.96	83	30.96	83
30.98	55	30.98	70	30.98	91	30.98	91
31	55	31	76	31	83	31	83
31.02	52	31.02	85	31.02	88	31.02	88
31.04	67	31.04	84	31.04	91	31.04	91
31.06	63	31.06	72	31.06	84	31.06	84
31.08	72	31.08	87	31.08	77	31.08	77
31.1	72	31.1	72	31.1	88	31.1	88
31.12	59	31.12	79	31.12	84	31.12	84
31.14	62	31.14	71	31.14	87	31.14	87
31.16	76	31.16	90	31.16	74	31.16	74
31.18	66	31.18	92	31.18	70	31.18	70
31.2	65	31.2	68	31.2	79	31.2	79
31.22	72	31.22	85	31.22	57	31.22	57
31.24	74	31.24	107	31.24	81	31.24	81
31.26	86	31.26	89	31.26	76	31.26	76
31.28	76	31.28	104	31.28	87	31.28	87
31.3	90	31.3	115	31.3	68	31.3	68
31.32	104	31.32	112	31.32	83	31.32	83
31.34	114	31.34	137	31.34	88	31.34	88
31.36	122	31.36	170	31.36	69	31.36	69
31.38	158	31.38	256	31.38	87	31.38	87
31.4	137	31.4	298	31.4	84	31.4	84
31.42	137	31.42	272	31.42	77	31.42	77
31.44	153	31.44	274	31.44	81	31.44	81
31.46	130	31.46	257	31.46	61	31.46	61
31.48	142	31.48	307	31.48	74	31.48	74
31.5	126	31.5	299	31.5	91	31.5	91
31.52	119	31.52	273	31.52	91	31.52	91
31.54	118	31.54	247	31.54	69	31.54	69
31.56	103	31.56	217	31.56	81	31.56	81
31.58	75	31.58	172	31.58	70	31.58	70
31.6	85	31.6	162	31.6	79	31.6	79
31.62	79	31.62	131	31.62	72	31.62	72
31.64	82	31.64	127	31.64	74	31.64	74
31.66	66	31.66	75	31.66	80	31.66	80
31.68	79	31.68	68	31.68	74	31.68	74
31.7	62	31.7	76	31.7	79	31.7	79
31.72	60	31.72	63	31.72	63	31.72	63
31.74	56	31.74	90	31.74	72	31.74	72
31.76	59	31.76	70	31.76	85	31.76	85
31.78	59	31.78	96	31.78	79	31.78	79
31.8	65	31.8	85	31.8	81	31.8	81
31.82	77	31.82	78	31.82	79	31.82	79
31.84	69	31.84	88	31.84	82	31.84	82
31.86	61	31.86	79	31.86	77	31.86	77
31.88	63	31.88	73	31.88	85	31.88	85
31.9	58	31.9	77	31.9	69	31.9	69
31.92	65	31.92	68	31.92	58	31.92	58
31.94	61	31.94	76	31.94	87	31.94	87
31.96	51	31.96	79	31.96	74	31.96	74
31.98	64	31.98	64	31.98	78	31.98	78
32	72	32	79	32	89	32	89
32.02	68	32.02	63	32.02	70	32.02	70
32.04	57	32.04	62	32.04	74	32.04	74
32.06	51	32.06	83	32.06	77	32.06	77
32.08	60	32.08	83	32.08	79	32.08	79
32.1	70	32.1	93	32.1	80	32.1	80
32.12	67	32.12	70	32.12	70	32.12	70
32.14	60	32.14	79	32.14	71	32.14	71
32.16	67	32.16	72	32.16	73	32.16	73
32.18	64	32.18	85	32.18	85	32.18	85
32.2	55	32.2	74	32.2	69	32.2	69
32.22	65	32.22	74	32.22	64	32.22	64
32.24	73	32.24	75	32.24	66	32.24	66
32.26	60	32.26	67	32.26	75	32.26	75
32.28	61	32.28	72	32.28	79	32.28	79
32.3	77	32.3	60	32.3	76	32.3	76
32.32	68	32.32	73	32.32	81	32.32	81
32.34	70	32.34	76	32.34	82	32.34	82
32.36	66	32.36	64	32.36	91	32.36	91
32.38	61	32.38	73	32.38	79	32.38	79
32.4	65	32.4	95	32.4	77	32.4	77
32.42	64	32.42	72	32.42	62	32.42	62
32.44	65	32.44	75	32.44	71	32.44	71
32.46	80	32.46	89	32.46	81	32.46	81
32.48	55	32.48	68	32.48	74	32.48	74
32.5	66	32.5	76	32.5	70	32.5	70
32.52	65	32.52	67	32.52	77	32.52	77
32.54	52	32.54	62	32.54	72	32.54	72
32.56	57	32.56	80	32.56	69	32.56	69
32.58	55	32.58	63	32.58	71	32.58	71
32.6	82	32.6	69	32.6	57	32.6	57
32.62	55	32.62	70	32.62	64	32.62	64
32.64	51	32.64	79	32.64	58	32.64	58
32.66	76	32.66	70	32.66	64	32.66	64
32.68	64	32.68	80	32.68	70	32.68	70
32.7	49	32.7	61	32.7	83	32.7	83
32.72	56	32.72	65	32.72	73	32.72	73
32.74	58	32.74	69	32.74	57	32.74	57
32.76	84	32.76	59	32.76	62	32.76	62
32.78	68	32.78	59	32.78	79	32.78	79
32.8	58	32.8	65	32.8	76	32.8	76
32.82	48	32.82	67	32.82	73	32.82	73
32.84	56	32.84	60	32.84	69	32.84	69
32.86	68	32.86	74	32.86	74	32.86	74
32.88	57	32.88	77	32.88	66	32.88	66
32.9	56	32.9	54	32.9	81	32.9	81
32.92	68	32.92	66	32.92	68	32.92	68
32.94	73	32.94	89	32.94	82	32.94	82
32.96	65	32.96	80	32.96	68	32.96	68
32.98	70	32.98	70	32.98	77	32.98	77
33	54	33	63	33	62	33	62
33.02	54	33.02	67	33.02	71	33.02	71
33.04	72	33.04	54	33.04	79	33.04	79
33.06	65	33.06	65	33.06	77	33.06	77
33.08	57	33.08	94	33.08	75	33.08	75
33.1	53	33.1	68	33.1	50	33.1	50
33.12	62	33.12	77	33.12	62	33.12	62
33.14	50	33.14	75	33.14	69	33.14	69
33.16	53	33.16	82	33.16	67	33.16	67
33.18	61	33.18	98	33.18	74	33.18	74
33.2	55	33.2	80	33.2	66	33.2	66
33.22	71	33.22	88	33.22	60	33.22	60
33.24	79	33.24	113	33.24	65	33.24	65
33.26	79	33.26	105	33.26	70	33.26	70
33.28	74	33.28	138	33.28	66	33.28	66
33.3	77	33.3	122	33.3	80	33.3	80
33.32	65	33.32	147	33.32	68	33.32	68
33.34	81	33.34	129	33.34	66	33.34	66
33.36	86	33.36	159	33.36	67	33.36	67
33.38	72	33.38	167	33.38	62	33.38	62
33.4	64	33.4	156	33.4	59	33.4	59
33.42	70	33.42	148	33.42	71	33.42	71
33.44	58	33.44	138	33.44	70	33.44	70
33.46	70	33.46	126	33.46	61	33.46	61
33.48	56	33.48	123	33.48	62	33.48	62
33.5	70	33.5	138	33.5	65	33.5	65
33.52	71	33.52	100	33.52	57	33.52	57
33.54	67	33.54	113	33.54	57	33.54	57
33.56	67	33.56	129	33.56	55	33.56	55
33.58	65	33.58	95	33.58	59	33.58	59
33.6	85	33.6	88	33.6	57	33.6	57
33.62	76	33.62	88	33.62	59	33.62	59
33.64	70	33.64	92	33.64	69	33.64	69
33.66	72	33.66	83	33.66	61	33.66	61
33.68	64	33.68	106	33.68	70	33.68	70
33.7	56	33.7	84	33.7	68	33.7	68
33.72	67	33.72	60	33.72	65	33.72	65
33.74	55	33.74	84	33.74	56	33.74	56
33.76	53	33.76	76	33.76	55	33.76	55
33.78	63	33.78	63	33.78	74	33.78	74
33.8	60	33.8	88	33.8	68	33.8	68
33.82	64	33.82	77	33.82	58	33.82	58
33.84	56	33.84	72	33.84	52	33.84	52
33.86	59	33.86	74	33.86	65	33.86	65
33.88	52	33.88	67	33.88	55	33.88	55
33.9	57	33.9	76	33.9	65	33.9	65
33.92	62	33.92	64	33.92	54	33.92	54
33.94	65	33.94	86	33.94	57	33.94	57
33.96	70	33.96	79	33.96	66	33.96	66
33.98	57	33.98	99	33.98	59	33.98	59
34	55	34	84	34	60	34	60
34.02	55	34.02	74	34.02	69	34.02	69
34.04	65	34.04	102	34.04	55	34.04	55
34.06	61	34.06	112	34.06	61	34.06	61
34.08	59	34.08	136	34.08	60	34.08	60
34.1	92	34.1	140	34.1	73	34.1	73
34.12	83	34.12	201	34.12	55	34.12	55
34.14	91	34.14	230	34.14	66	34.14	66
34.16	104	34.16	266	34.16	63	34.16	63
34.18	122	34.18	298	34.18	63	34.18	63
34.2	100	34.2	310	34.2	52	34.2	52
34.22	129	34.22	295	34.22	53	34.22	53
34.24	130	34.24	312	34.24	70	34.24	70
34.26	117	34.26	351	34.26	62	34.26	62
34.28	142	34.28	394	34.28	68	34.28	68
34.3	118	34.3	326	34.3	50	34.3	50
34.32	99	34.32	284	34.32	60	34.32	60
34.34	89	34.34	275	34.34	63	34.34	63
34.36	90	34.36	266	34.36	57	34.36	57
34.38	83	34.38	231	34.38	52	34.38	52
34.4	80	34.4	172	34.4	60	34.4	60
34.42	61	34.42	185	34.42	52	34.42	52
34.44	55	34.44	147	34.44	58	34.44	58
34.46	50	34.46	119	34.46	59	34.46	59
34.48	65	34.48	110	34.48	58	34.48	58
34.5	57	34.5	115	34.5	54	34.5	54
34.52	64	34.52	90	34.52	50	34.52	50
34.54	63	34.54	76	34.54	63	34.54	63
34.56	50	34.56	79	34.56	66	34.56	66
34.58	52	34.58	68	34.58	65	34.58	65
34.6	54	34.6	54	34.6	46	34.6	46
34.62	64	34.62	74	34.62	58	34.62	58
34.64	65	34.64	65	34.64	63	34.64	63
34.66	60	34.66	74	34.66	65	34.66	65
34.68	58	34.68	81	34.68	58	34.68	58
34.7	81	34.7	68	34.7	52	34.7	52
34.72	64	34.72	68	34.72	48	34.72	48
34.74	57	34.74	75	34.74	62	34.74	62
34.76	67	34.76	91	34.76	53	34.76	53
34.78	68	34.78	82	34.78	68	34.78	68
34.8	74	34.8	106	34.8	62	34.8	62
34.82	63	34.82	96	34.82	52	34.82	52
34.84	67	34.84	100	34.84	64	34.84	64
34.86	67	34.86	140	34.86	53	34.86	53
34.88	90	34.88	153	34.88	61	34.88	61
34.9	104	34.9	170	34.9	68	34.9	68
34.92	70	34.92	164	34.92	57	34.92	57
34.94	72	34.94	221	34.94	60	34.94	60
34.96	90	34.96	206	34.96	62	34.96	62
34.98	75	34.98	226	34.98	53	34.98	53
35	78	35	214	35	61	35	61
35.02	84	35.02	201	35.02	62	35.02	62
35.04	70	35.04	185	35.04	43	35.04	43
35.06	80	35.06	191	35.06	73	35.06	73
35.08	59	35.08	170	35.08	64	35.08	64
35.1	51	35.1	143	35.1	40	35.1	40
35.12	40	35.12	124	35.12	54	35.12	54
35.14	47	35.14	125	35.14	56	35.14	56
35.16	59	35.16	87	35.16	56	35.16	56
35.18	60	35.18	78	35.18	56	35.18	56
35.2	63	35.2	87	35.2	47	35.2	47
35.22	53	35.22	79	35.22	60	35.22	60
35.24	53	35.24	65	35.24	58	35.24	58
35.26	61	35.26	69	35.26	67	35.26	67
35.28	66	35.28	62	35.28	58	35.28	58
35.3	49	35.3	62	35.3	60	35.3	60
35.32	51	35.32	61	35.32	66	35.32	66
35.34	49	35.34	73	35.34	61	35.34	61
35.36	53	35.36	71	35.36	56	35.36	56
35.38	60	35.38	86	35.38	51	35.38	51
35.4	47	35.4	85	35.4	51	35.4	51
35.42	53	35.42	81	35.42	48	35.42	48
35.44	46	35.44	68	35.44	62	35.44	62
35.46	58	35.46	65	35.46	58	35.46	58
35.48	41	35.48	80	35.48	53	35.48	53
35.5	63	35.5	75	35.5	66	35.5	66
35.52	55	35.52	86	35.52	57	35.52	57
35.54	51	35.54	74	35.54	58	35.54	58
35.56	64	35.56	67	35.56	62	35.56	62
35.58	56	35.58	79	35.58	57	35.58	57
35.6	62	35.6	72	35.6	59	35.6	59
35.62	58	35.62	71	35.62	57	35.62	57
35.64	49	35.64	68	35.64	70	35.64	70
35.66	70	35.66	75	35.66	64	35.66	64
35.68	50	35.68	80	35.68	64	35.68	64
35.7	50	35.7	60	35.7	55	35.7	55
35.72	61	35.72	79	35.72	53	35.72	53
35.74	59	35.74	97	35.74	66	35.74	66
35.76	66	35.76	103	35.76	62	35.76	62
35.78	91	35.78	102	35.78	42	35.78	42
35.8	53	35.8	119	35.8	56	35.8	56
35.82	77	35.82	126	35.82	59	35.82	59
35.84	82	35.84	130	35.84	51	35.84	51
35.86	96	35.86	180	35.86	48	35.86	48
35.88	112	35.88	193	35.88	54	35.88	54
35.9	129	35.9	206	35.9	59	35.9	59
35.92	105	35.92	221	35.92	62	35.92	62
35.94	122	35.94	237	35.94	63	35.94	63
35.96	107	35.96	294	35.96	58	35.96	58
35.98	122	35.98	256	35.98	62	35.98	62
36	121	36	271	36	64	36	64
36.02	102	36.02	288	36.02	57	36.02	57
36.04	98	36.04	286	36.04	51	36.04	51
36.06	107	36.06	203	36.06	59	36.06	59
36.08	111	36.08	183	36.08	55	36.08	55
36.1	90	36.1	192	36.1	58	36.1	58
36.12	88	36.12	182	36.12	53	36.12	53
36.14	85	36.14	190	36.14	59	36.14	59
36.16	87	36.16	193	36.16	66	36.16	66
36.18	72	36.18	142	36.18	72	36.18	72
36.2	85	36.2	140	36.2	69	36.2	69
36.22	92	36.22	154	36.22	57	36.22	57
36.24	85	36.24	159	36.24	59	36.24	59
36.26	62	36.26	150	36.26	47	36.26	47
36.28	81	36.28	125	36.28	47	36.28	47
36.3	71	36.3	103	36.3	57	36.3	57
36.32	68	36.32	99	36.32	48	36.32	48
36.34	69	36.34	94	36.34	60	36.34	60
36.36	73	36.36	81	36.36	51	36.36	51
36.38	58	36.38	72	36.38	51	36.38	51
36.4	52	36.4	79	36.4	56	36.4	56
36.42	53	36.42	89	36.42	71	36.42	71
36.44	54	36.44	82	36.44	57	36.44	57
36.46	57	36.46	66	36.46	62	36.46	62
36.48	63	36.48	72	36.48	49	36.48	49
36.5	54	36.5	63	36.5	49	36.5	49
36.52	55	36.52	61	36.52	55	36.52	55
36.54	51	36.54	60	36.54	69	36.54	69
36.56	46	36.56	72	36.56	60	36.56	60
36.58	46	36.58	79	36.58	72	36.58	72
36.6	58	36.6	73	36.6	58	36.6	58
36.62	56	36.62	82	36.62	58	36.62	58
36.64	63	36.64	78	36.64	58	36.64	58
36.66	52	36.66	78	36.66	59	36.66	59
36.68	63	36.68	67	36.68	51	36.68	51
36.7	53	36.7	84	36.7	51	36.7	51
36.72	51	36.72	75	36.72	54	36.72	54
36.74	57	36.74	74	36.74	55	36.74	55
36.76	57	36.76	81	36.76	53	36.76	53
36.78	57	36.78	69	36.78	46	36.78	46
36.8	43	36.8	72	36.8	54	36.8	54
36.82	56	36.82	77	36.82	66	36.82	66
36.84	72	36.84	81	36.84	58	36.84	58
36.86	56	36.86	87	36.86	56	36.86	56
36.88	62	36.88	82	36.88	46	36.88	46
36.9	66	36.9	101	36.9	59	36.9	59
36.92	42	36.92	118	36.92	54	36.92	54
36.94	64	36.94	120	36.94	54	36.94	54
36.96	81	36.96	118	36.96	54	36.96	54
36.98	82	36.98	143	36.98	51	36.98	51
37	90	37	156	37	64	37	64
37.02	101	37.02	213	37.02	61	37.02	61
37.04	109	37.04	280	37.04	55	37.04	55
37.06	131	37.06	292	37.06	60	37.06	60
37.08	125	37.08	312	37.08	54	37.08	54
37.1	121	37.1	385	37.1	63	37.1	63
37.12	106	37.12	405	37.12	59	37.12	59
37.14	118	37.14	438	37.14	48	37.14	48
37.16	115	37.16	380	37.16	54	37.16	54
37.18	106	37.18	354	37.18	62	37.18	62
37.2	141	37.2	291	37.2	49	37.2	49
37.22	201	37.22	249	37.22	51	37.22	51
37.24	293	37.24	201	37.24	56	37.24	56
37.26	333	37.26	164	37.26	48	37.26	48
37.28	203	37.28	192	37.28	68	37.28	68
37.3	152	37.3	147	37.3	52	37.3	52
37.32	166	37.32	128	37.32	48	37.32	48
37.34	199	37.34	112	37.34	43	37.34	43
37.36	229	37.36	110	37.36	46	37.36	46
37.38	138	37.38	101	37.38	47	37.38	47
37.4	79	37.4	100	37.4	61	37.4	61
37.42	83	37.42	133	37.42	60	37.42	60
37.44	67	37.44	130	37.44	48	37.44	48
37.46	79	37.46	133	37.46	46	37.46	46
37.48	72	37.48	115	37.48	70	37.48	70
37.5	65	37.5	122	37.5	68	37.5	68
37.52	82	37.52	103	37.52	53	37.52	53
37.54	65	37.54	108	37.54	61	37.54	61
37.56	51	37.56	110	37.56	54	37.56	54
37.58	73	37.58	103	37.58	57	37.58	57
37.6	55	37.6	92	37.6	51	37.6	51
37.62	55	37.62	87	37.62	50	37.62	50
37.64	58	37.64	92	37.64	55	37.64	55
37.66	64	37.66	71	37.66	52	37.66	52
37.68	59	37.68	74	37.68	51	37.68	51
37.7	60	37.7	109	37.7	38	37.7	38
37.72	82	37.72	116	37.72	48	37.72	48
37.74	82	37.74	127	37.74	43	37.74	43
37.76	89	37.76	175	37.76	43	37.76	43
37.78	80	37.78	189	37.78	44	37.78	44
37.8	94	37.8	201	37.8	61	37.8	61
37.82	78	37.82	218	37.82	47	37.82	47
37.84	93	37.84	220	37.84	54	37.84	54
37.86	108	37.86	227	37.86	45	37.86	45
37.88	99	37.88	234	37.88	54	37.88	54
37.9	105	37.9	270	37.9	47	37.9	47
37.92	112	37.92	309	37.92	60	37.92	60
37.94	102	37.94	323	37.94	49	37.94	49
37.96	109	37.96	336	37.96	51	37.96	51
37.98	111	37.98	338	37.98	45	37.98	45
38	80	38	322	38	53	38	53
38.02	103	38.02	294	38.02	55	38.02	55
38.04	82	38.04	320	38.04	55	38.04	55
38.06	78	38.06	311	38.06	60	38.06	60
38.08	67	38.08	327	38.08	41	38.08	41
38.1	82	38.1	240	38.1	43	38.1	43
38.12	78	38.12	199	38.12	53	38.12	53
38.14	59	38.14	167	38.14	54	38.14	54
38.16	63	38.16	193	38.16	68	38.16	68
38.18	68	38.18	148	38.18	58	38.18	58
38.2	62	38.2	111	38.2	55	38.2	55
38.22	67	38.22	116	38.22	60	38.22	60
38.24	65	38.24	67	38.24	67	38.24	67
38.26	57	38.26	100	38.26	58	38.26	58
38.28	63	38.28	78	38.28	48	38.28	48
38.3	54	38.3	58	38.3	72	38.3	72
38.32	66	38.32	78	38.32	63	38.32	63
38.34	56	38.34	71	38.34	48	38.34	48
38.36	62	38.36	77	38.36	56	38.36	56
38.38	59	38.38	63	38.38	47	38.38	47
38.4	49	38.4	75	38.4	66	38.4	66
38.42	55	38.42	60	38.42	45	38.42	45
38.44	67	38.44	71	38.44	65	38.44	65
38.46	75	38.46	74	38.46	69	38.46	69
38.48	58	38.48	73	38.48	58	38.48	58
38.5	71	38.5	69	38.5	71	38.5	71
38.52	44	38.52	71	38.52	62	38.52	62
38.54	42	38.54	68	38.54	48	38.54	48
38.56	69	38.56	77	38.56	62	38.56	62
38.58	61	38.58	86	38.58	57	38.58	57
38.6	48	38.6	62	38.6	51	38.6	51
38.62	42	38.62	65	38.62	39	38.62	39
38.64	48	38.64	67	38.64	49	38.64	49
38.66	59	38.66	78	38.66	44	38.66	44
38.68	44	38.68	63	38.68	46	38.68	46
38.7	56	38.7	64	38.7	55	38.7	55
38.72	58	38.72	67	38.72	47	38.72	47
38.74	59	38.74	78	38.74	58	38.74	58
38.76	74	38.76	60	38.76	46	38.76	46
38.78	63	38.78	67	38.78	46	38.78	46
38.8	52	38.8	69	38.8	55	38.8	55
38.82	54	38.82	74	38.82	46	38.82	46
38.84	56	38.84	66	38.84	56	38.84	56
38.86	58	38.86	65	38.86	50	38.86	50
38.88	50	38.88	59	38.88	51	38.88	51
38.9	62	38.9	66	38.9	52	38.9	52
38.92	58	38.92	72	38.92	55	38.92	55
38.94	56	38.94	68	38.94	52	38.94	52
38.96	58	38.96	79	38.96	49	38.96	49
38.98	60	38.98	77	38.98	50	38.98	50
39	67	39	66	39	52	39	52
39.02	67	39.02	65	39.02	69	39.02	69
39.04	51	39.04	81	39.04	59	39.04	59
39.06	55	39.06	65	39.06	62	39.06	62
39.08	47	39.08	59	39.08	63	39.08	63
39.1	72	39.1	65	39.1	41	39.1	41
39.12	68	39.12	62	39.12	50	39.12	50
39.14	58	39.14	83	39.14	44	39.14	44
39.16	56	39.16	75	39.16	45	39.16	45
39.18	55	39.18	56	39.18	44	39.18	44
39.2	43	39.2	81	39.2	54	39.2	54
39.22	46	39.22	98	39.22	38	39.22	38
39.24	47	39.24	76	39.24	61	39.24	61
39.26	65	39.26	89	39.26	52	39.26	52
39.28	59	39.28	102	39.28	53	39.28	53
39.3	57	39.3	111	39.3	49	39.3	49
39.32	76	39.32	112	39.32	49	39.32	49
39.34	54	39.34	135	39.34	65	39.34	65
39.36	81	39.36	169	39.36	56	39.36	56
39.38	95	39.38	162	39.38	60	39.38	60
39.4	63	39.4	184	39.4	58	39.4	58
39.42	49	39.42	173	39.42	56	39.42	56
39.44	67	39.44	184	39.44	51	39.44	51
39.46	64	39.46	163	39.46	58	39.46	58
39.48	45	39.48	170	39.48	64	39.48	64
39.5	63	39.5	143	39.5	39	39.5	39
39.52	60	39.52	141	39.52	39	39.52	39
39.54	50	39.54	115	39.54	60	39.54	60
39.56	57	39.56	119	39.56	47	39.56	47
39.58	57	39.58	111	39.58	51	39.58	51
39.6	54	39.6	92	39.6	44	39.6	44
39.62	56	39.62	78	39.62	59	39.62	59
39.64	50	39.64	84	39.64	51	39.64	51
39.66	62	39.66	83	39.66	44	39.66	44
39.68	61	39.68	71	39.68	45	39.68	45
39.7	49	39.7	73	39.7	42	39.7	42
39.72	46	39.72	62	39.72	49	39.72	49
39.74	61	39.74	79	39.74	52	39.74	52
39.76	54	39.76	79	39.76	38	39.76	38
39.78	54	39.78	69	39.78	41	39.78	41
39.8	54	39.8	68	39.8	45	39.8	45
39.82	59	39.82	66	39.82	56	39.82	56
39.84	64	39.84	85	39.84	49	39.84	49
39.86	55	39.86	70	39.86	40	39.86	40
39.88	74	39.88	72	39.88	41	39.88	41
39.9	56	39.9	68	39.9	64	39.9	64
39.92	67	39.92	67	39.92	58	39.92	58
39.94	53	39.94	82	39.94	54	39.94	54
39.96	53	39.96	78	39.96	55	39.96	55
39.98	66	39.98	77	39.98	63	39.98	63
40	54	40	91	40	76	40	76
40.02	36	40.02	77	40.02	47	40.02	47
40.04	55	40.04	82	40.04	60	40.04	60
40.06	52	40.06	81	40.06	56	40.06	56
40.08	64	40.08	90	40.08	50	40.08	50
40.1	45	40.1	90	40.1	47	40.1	47
40.12	53	40.12	74	40.12	51	40.12	51
40.14	57	40.14	64	40.14	56	40.14	56
40.16	53	40.16	81	40.16	43	40.16	43
40.18	69	40.18	67	40.18	49	40.18	49
40.2	50	40.2	75	40.2	67	40.2	67
40.22	66	40.22	79	40.22	45	40.22	45
40.24	58	40.24	66	40.24	60	40.24	60
40.26	55	40.26	84	40.26	63	40.26	63
40.28	63	40.28	73	40.28	56	40.28	56
40.3	56	40.3	69	40.3	61	40.3	61
40.32	39	40.32	66	40.32	38	40.32	38
40.34	63	40.34	70	40.34	53	40.34	53
40.36	50	40.36	65	40.36	66	40.36	66
40.38	60	40.38	77	40.38	53	40.38	53
40.4	43	40.4	76	40.4	57	40.4	57
40.42	61	40.42	74	40.42	51	40.42	51
40.44	62	40.44	66	40.44	60	40.44	60
40.46	57	40.46	67	40.46	63	40.46	63
40.48	67	40.48	88	40.48	48	40.48	48
40.5	66	40.5	94	40.5	47	40.5	47
40.52	56	40.52	93	40.52	50	40.52	50
40.54	65	40.54	81	40.54	48	40.54	48
40.56	60	40.56	86	40.56	58	40.56	58
40.58	51	40.58	71	40.58	56	40.58	56
40.6	68	40.6	90	40.6	54	40.6	54
40.62	69	40.62	81	40.62	49	40.62	49
40.64	55	40.64	94	40.64	51	40.64	51
40.66	56	40.66	98	40.66	47	40.66	47
40.68	59	40.68	104	40.68	57	40.68	57
40.7	51	40.7	117	40.7	56	40.7	56
40.72	54	40.72	88	40.72	58	40.72	58
40.74	59	40.74	98	40.74	64	40.74	64
40.76	62	40.76	96	40.76	66	40.76	66
40.78	54	40.78	108	40.78	53	40.78	53
40.8	44	40.8	78	40.8	57	40.8	57
40.82	62	40.82	74	40.82	58	40.82	58
40.84	45	40.84	73	40.84	48	40.84	48
40.86	52	40.86	80	40.86	54	40.86	54
40.88	68	40.88	79	40.88	48	40.88	48
40.9	61	40.9	85	40.9	63	40.9	63
40.92	55	40.92	65	40.92	61	40.92	61
40.94	51	40.94	85	40.94	59	40.94	59
40.96	57	40.96	79	40.96	62	40.96	62
40.98	53	40.98	70	40.98	73	40.98	73
41	64	41	68	41	65	41	65
41.02	50	41.02	72	41.02	63	41.02	63
41.04	52	41.04	56	41.04	60	41.04	60
41.06	62	41.06	82	41.06	50	41.06	50
41.08	57	41.08	66	41.08	56	41.08	56
41.1	58	41.1	68	41.1	52	41.1	52
41.12	54	41.12	76	41.12	42	41.12	42
41.14	65	41.14	65	41.14	55	41.14	55
41.16	49	41.16	72	41.16	50	41.16	50
41.18	50	41.18	70	41.18	59	41.18	59
41.2	59	41.2	53	41.2	44	41.2	44
41.22	65	41.22	71	41.22	44	41.22	44
41.24	50	41.24	56	41.24	68	41.24	68
41.26	50	41.26	58	41.26	52	41.26	52
41.28	51	41.28	68	41.28	62	41.28	62
41.3	62	41.3	84	41.3	60	41.3	60
41.32	54	41.32	65	41.32	49	41.32	49
41.34	53	41.34	71	41.34	50	41.34	50
41.36	48	41.36	77	41.36	44	41.36	44
41.38	50	41.38	66	41.38	49	41.38	49
41.4	55	41.4	76	41.4	51	41.4	51
41.42	50	41.42	78	41.42	58	41.42	58
41.44	46	41.44	79	41.44	60	41.44	60
41.46	48	41.46	67	41.46	74	41.46	74
41.48	61	41.48	72	41.48	48	41.48	48
41.5	57	41.5	63	41.5	46	41.5	46
41.52	65	41.52	74	41.52	65	41.52	65
41.54	70	41.54	86	41.54	69	41.54	69
41.56	53	41.56	72	41.56	59	41.56	59
41.58	53	41.58	64	41.58	55	41.58	55
41.6	57	41.6	73	41.6	54	41.6	54
41.62	50	41.62	66	41.62	51	41.62	51
41.64	48	41.64	85	41.64	64	41.64	64
41.66	52	41.66	78	41.66	42	41.66	42
41.68	60	41.68	69	41.68	51	41.68	51
41.7	52	41.7	78	41.7	55	41.7	55
41.72	55	41.72	78	41.72	66	41.72	66
41.74	54	41.74	62	41.74	55	41.74	55
41.76	53	41.76	62	41.76	58	41.76	58
41.78	43	41.78	73	41.78	51	41.78	51
41.8	65	41.8	49	41.8	77	41.8	77
41.82	62	41.82	61	41.82	71	41.82	71
41.84	60	41.84	76	41.84	59	41.84	59
41.86	48	41.86	78	41.86	54	41.86	54
41.88	59	41.88	85	41.88	62	41.88	62
41.9	62	41.9	71	41.9	54	41.9	54
41.92	39	41.92	54	41.92	59	41.92	59
41.94	54	41.94	82	41.94	62	41.94	62
41.96	61	41.96	86	41.96	66	41.96	66
41.98	55	41.98	62	41.98	68	41.98	68
42	53	42	79	42	59	42	59
42.02	66	42.02	79	42.02	85	42.02	85
42.04	64	42.04	106	42.04	50	42.04	50
42.06	78	42.06	98	42.06	61	42.06	61
42.08	66	42.08	110	42.08	59	42.08	59
42.1	64	42.1	113	42.1	48	42.1	48
42.12	61	42.12	130	42.12	52	42.12	52
42.14	69	42.14	136	42.14	54	42.14	54
42.16	78	42.16	136	42.16	55	42.16	55
42.18	63	42.18	117	42.18	55	42.18	55
42.2	55	42.2	117	42.2	61	42.2	61
42.22	55	42.22	115	42.22	63	42.22	63
42.24	64	42.24	129	42.24	60	42.24	60
42.26	60	42.26	116	42.26	60	42.26	60
42.28	69	42.28	107	42.28	67	42.28	67
42.3	53	42.3	90	42.3	57	42.3	57
42.32	61	42.32	96	42.32	63	42.32	63
42.34	57	42.34	99	42.34	61	42.34	61
42.36	51	42.36	86	42.36	58	42.36	58
42.38	49	42.38	94	42.38	52	42.38	52
42.4	56	42.4	78	42.4	46	42.4	46
42.42	69	42.42	64	42.42	60	42.42	60
42.44	56	42.44	87	42.44	64	42.44	64
42.46	74	42.46	106	42.46	55	42.46	55
42.48	65	42.48	84	42.48	46	42.48	46
42.5	60	42.5	67	42.5	70	42.5	70
42.52	55	42.52	83	42.52	52	42.52	52
42.54	65	42.54	73	42.54	51	42.54	51
42.56	73	42.56	88	42.56	59	42.56	59
42.58	58	42.58	107	42.58	69	42.58	69
42.6	55	42.6	90	42.6	68	42.6	68
42.62	67	42.62	87	42.62	54	42.62	54
42.64	68	42.64	107	42.64	54	42.64	54
42.66	96	42.66	144	42.66	78	42.66	78
42.68	69	42.68	168	42.68	53	42.68	53
42.7	99	42.7	193	42.7	59	42.7	59
42.72	104	42.72	234	42.72	61	42.72	61
42.74	138	42.74	230	42.74	52	42.74	52
42.76	157	42.76	270	42.76	63	42.76	63
42.78	138	42.78	288	42.78	71	42.78	71
42.8	130	42.8	285	42.8	51	42.8	51
42.82	118	42.82	301	42.82	55	42.82	55
42.84	128	42.84	312	42.84	71	42.84	71
42.86	114	42.86	329	42.86	71	42.86	71
42.88	112	42.88	302	42.88	65	42.88	65
42.9	93	42.9	232	42.9	68	42.9	68
42.92	100	42.92	257	42.92	68	42.92	68
42.94	89	42.94	194	42.94	75	42.94	75
42.96	65	42.96	201	42.96	63	42.96	63
42.98	74	42.98	160	42.98	59	42.98	59
43	59	43	160	43	52	43	52
43.02	76	43.02	117	43.02	83	43.02	83
43.04	56	43.04	114	43.04	63	43.04	63
43.06	74	43.06	100	43.06	73	43.06	73
43.08	70	43.08	104	43.08	45	43.08	45
43.1	64	43.1	117	43.1	70	43.1	70
43.12	60	43.12	90	43.12	60	43.12	60
43.14	68	43.14	104	43.14	58	43.14	58
43.16	55	43.16	124	43.16	51	43.16	51
43.18	61	43.18	114	43.18	57	43.18	57
43.2	70	43.2	139	43.2	58	43.2	58
43.22	53	43.22	131	43.22	70	43.22	70
43.24	77	43.24	128	43.24	55	43.24	55
43.26	56	43.26	114	43.26	62	43.26	62
43.28	53	43.28	106	43.28	59	43.28	59
43.3	61	43.3	122	43.3	49	43.3	49
43.32	46	43.32	94	43.32	63	43.32	63
43.34	56	43.34	104	43.34	63	43.34	63
43.36	53	43.36	83	43.36	57	43.36	57
43.38	67	43.38	75	43.38	71	43.38	71
43.4	79	43.4	80	43.4	53	43.4	53
43.42	64	43.42	92	43.42	49	43.42	49
43.44	63	43.44	90	43.44	62	43.44	62
43.46	51	43.46	86	43.46	61	43.46	61
43.48	62	43.48	91	43.48	67	43.48	67
43.5	63	43.5	89	43.5	61	43.5	61
43.52	51	43.52	75	43.52	63	43.52	63
43.54	41	43.54	77	43.54	70	43.54	70
43.56	49	43.56	91	43.56	66	43.56	66
43.58	57	43.58	88	43.58	63	43.58	63
43.6	66	43.6	71	43.6	54	43.6	54
43.62	55	43.62	87	43.62	66	43.62	66
43.64	67	43.64	69	43.64	60	43.64	60
43.66	58	43.66	83	43.66	65	43.66	65
43.68	66	43.68	62	43.68	60	43.68	60
43.7	66	43.7	81	43.7	50	43.7	50
43.72	62	43.72	69	43.72	56	43.72	56
43.74	60	43.74	65	43.74	63	43.74	63
43.76	64	43.76	79	43.76	53	43.76	53
43.78	60	43.78	90	43.78	62	43.78	62
43.8	52	43.8	80	43.8	60	43.8	60
43.82	53	43.82	83	43.82	67	43.82	67
43.84	67	43.84	77	43.84	54	43.84	54
43.86	60	43.86	95	43.86	54	43.86	54
43.88	63	43.88	88	43.88	66	43.88	66
43.9	75	43.9	95	43.9	48	43.9	48
43.92	75	43.92	105	43.92	56	43.92	56
43.94	71	43.94	104	43.94	53	43.94	53
43.96	86	43.96	104	43.96	53	43.96	53
43.98	78	43.98	124	43.98	78	43.98	78
44	61	44	109	44	70	44	70
44.02	99	44.02	131	44.02	72	44.02	72
44.04	71	44.04	130	44.04	68	44.04	68
44.06	62	44.06	128	44.06	65	44.06	65
44.08	81	44.08	135	44.08	61	44.08	61
44.1	67	44.1	112	44.1	68	44.1	68
44.12	71	44.12	127	44.12	71	44.12	71
44.14	55	44.14	125	44.14	60	44.14	60
44.16	59	44.16	119	44.16	57	44.16	57
44.18	61	44.18	113	44.18	56	44.18	56
44.2	60	44.2	101	44.2	61	44.2	61
44.22	61	44.22	98	44.22	59	44.22	59
44.24	50	44.24	80	44.24	62	44.24	62
44.26	60	44.26	79	44.26	56	44.26	56
44.28	48	44.28	76	44.28	43	44.28	43
44.3	63	44.3	81	44.3	71	44.3	71
44.32	57	44.32	100	44.32	80	44.32	80
44.34	62	44.34	93	44.34	73	44.34	73
44.36	81	44.36	116	44.36	55	44.36	55
44.38	70	44.38	97	44.38	56	44.38	56
44.4	62	44.4	110	44.4	56	44.4	56
44.42	72	44.42	120	44.42	59	44.42	59
44.44	77	44.44	107	44.44	60	44.44	60
44.46	63	44.46	101	44.46	54	44.46	54
44.48	56	44.48	72	44.48	67	44.48	67
44.5	63	44.5	104	44.5	60	44.5	60
44.52	59	44.52	108	44.52	67	44.52	67
44.54	61	44.54	88	44.54	60	44.54	60
44.56	56	44.56	103	44.56	54	44.56	54
44.58	60	44.58	99	44.58	64	44.58	64
44.6	66	44.6	75	44.6	60	44.6	60
44.62	50	44.62	85	44.62	61	44.62	61
44.64	61	44.64	97	44.64	60	44.64	60
44.66	56	44.66	79	44.66	74	44.66	74
44.68	49	44.68	62	44.68	54	44.68	54
44.7	70	44.7	82	44.7	59	44.7	59
44.72	69	44.72	88	44.72	55	44.72	55
44.74	58	44.74	83	44.74	64	44.74	64
44.76	59	44.76	82	44.76	60	44.76	60
44.78	59	44.78	73	44.78	51	44.78	51
44.8	61	44.8	93	44.8	70	44.8	70
44.82	48	44.82	76	44.82	54	44.82	54
44.84	52	44.84	77	44.84	59	44.84	59
44.86	61	44.86	93	44.86	71	44.86	71
44.88	48	44.88	72	44.88	49	44.88	49
44.9	53	44.9	59	44.9	60	44.9	60
44.92	50	44.92	64	44.92	58	44.92	58
44.94	62	44.94	78	44.94	68	44.94	68
44.96	55	44.96	71	44.96	71	44.96	71
44.98	65	44.98	84	44.98	60	44.98	60
45	55	45	71	45	52	45	52
45.02	55	45.02	82	45.02	62	45.02	62
45.04	69	45.04	74	45.04	53	45.04	53
45.06	58	45.06	79	45.06	51	45.06	51
45.08	52	45.08	107	45.08	57	45.08	57
45.1	82	45.1	115	45.1	62	45.1	62
45.12	64	45.12	92	45.12	64	45.12	64
45.14	74	45.14	117	45.14	81	45.14	81
45.16	89	45.16	93	45.16	60	45.16	60
45.18	82	45.18	114	45.18	48	45.18	48
45.2	83	45.2	114	45.2	45	45.2	45
45.22	82	45.22	134	45.22	59	45.22	59
45.24	73	45.24	132	45.24	50	45.24	50
45.26	74	45.26	147	45.26	60	45.26	60
45.28	59	45.28	129	45.28	57	45.28	57
45.3	66	45.3	107	45.3	43	45.3	43
45.32	75	45.32	118	45.32	58	45.32	58
45.34	67	45.34	112	45.34	65	45.34	65
45.36	68	45.36	105	45.36	77	45.36	77
45.38	61	45.38	110	45.38	48	45.38	48
45.4	61	45.4	121	45.4	58	45.4	58
45.42	62	45.42	92	45.42	66	45.42	66
45.44	72	45.44	88	45.44	50	45.44	50
45.46	77	45.46	91	45.46	41	45.46	41
45.48	66	45.48	73	45.48	57	45.48	57
45.5	68	45.5	102	45.5	68	45.5	68
45.52	69	45.52	105	45.52	53	45.52	53
45.54	87	45.54	107	45.54	50	45.54	50
45.56	80	45.56	103	45.56	41	45.56	41
45.58	79	45.58	104	45.58	39	45.58	39
45.6	88	45.6	112	45.6	60	45.6	60
45.62	78	45.62	144	45.62	73	45.62	73
45.64	76	45.64	138	45.64	56	45.64	56
45.66	71	45.66	172	45.66	53	45.66	53
45.68	66	45.68	165	45.68	54	45.68	54
45.7	78	45.7	167	45.7	53	45.7	53
45.72	81	45.72	125	45.72	58	45.72	58
45.74	93	45.74	112	45.74	59	45.74	59
45.76	101	45.76	113	45.76	45	45.76	45
45.78	81	45.78	139	45.78	40	45.78	40
45.8	68	45.8	116	45.8	58	45.8	58
45.82	58	45.82	107	45.82	56	45.82	56
45.84	65	45.84	98	45.84	53	45.84	53
45.86	59	45.86	84	45.86	63	45.86	63
45.88	71	45.88	79	45.88	48	45.88	48
45.9	63	45.9	56	45.9	61	45.9	61
45.92	70	45.92	62	45.92	62	45.92	62
45.94	51	45.94	86	45.94	58	45.94	58
45.96	58	45.96	81	45.96	80	45.96	80
45.98	54	45.98	66	45.98	50	45.98	50
46	58	46	65	46	48	46	48
46.02	66	46.02	79	46.02	58	46.02	58
46.04	58	46.04	67	46.04	50	46.04	50
46.06	60	46.06	82	46.06	50	46.06	50
46.08	63	46.08	68	46.08	55	46.08	55
46.1	63	46.1	82	46.1	43	46.1	43
46.12	57	46.12	79	46.12	47	46.12	47
46.14	60	46.14	82	46.14	49	46.14	49
46.16	58	46.16	70	46.16	52	46.16	52
46.18	71	46.18	91	46.18	47	46.18	47
46.2	52	46.2	73	46.2	56	46.2	56
46.22	57	46.22	81	46.22	53	46.22	53
46.24	59	46.24	84	46.24	60	46.24	60
46.26	70	46.26	77	46.26	54	46.26	54
46.28	74	46.28	85	46.28	58	46.28	58
46.3	79	46.3	80	46.3	49	46.3	49
46.32	80	46.32	96	46.32	44	46.32	44
46.34	76	46.34	108	46.34	42	46.34	42
46.36	80	46.36	130	46.36	45	46.36	45
46.38	49	46.38	123	46.38	61	46.38	61
46.4	65	46.4	110	46.4	60	46.4	60
46.42	73	46.42	130	46.42	50	46.42	50
46.44	76	46.44	120	46.44	45	46.44	45
46.46	69	46.46	104	46.46	58	46.46	58
46.48	59	46.48	94	46.48	59	46.48	59
46.5	61	46.5	93	46.5	53	46.5	53
46.52	63	46.52	98	46.52	48	46.52	48
46.54	49	46.54	94	46.54	48	46.54	48
46.56	49	46.56	95	46.56	55	46.56	55
46.58	67	46.58	75	46.58	57	46.58	57
46.6	69	46.6	83	46.6	56	46.6	56
46.62	52	46.62	68	46.62	58	46.62	58
46.64	66	46.64	79	46.64	61	46.64	61
46.66	51	46.66	72	46.66	49	46.66	49
46.68	57	46.68	82	46.68	56	46.68	56
46.7	63	46.7	67	46.7	60	46.7	60
46.72	64	46.72	76	46.72	60	46.72	60
46.74	51	46.74	69	46.74	63	46.74	63
46.76	45	46.76	77	46.76	68	46.76	68
46.78	50	46.78	72	46.78	48	46.78	48
46.8	56	46.8	64	46.8	36	46.8	36
46.82	65	46.82	65	46.82	46	46.82	46
46.84	69	46.84	87	46.84	47	46.84	47
46.86	65	46.86	80	46.86	46	46.86	46
46.88	56	46.88	58	46.88	53	46.88	53
46.9	48	46.9	74	46.9	56	46.9	56
46.92	65	46.92	66	46.92	48	46.92	48
46.94	57	46.94	65	46.94	53	46.94	53
46.96	54	46.96	72	46.96	62	46.96	62
46.98	55	46.98	78	46.98	59	46.98	59
47	68	47	62	47	47	47	47
47.02	55	47.02	73	47.02	47	47.02	47
47.04	45	47.04	89	47.04	54	47.04	54
47.06	73	47.06	86	47.06	51	47.06	51
47.08	71	47.08	99	47.08	62	47.08	62
47.1	51	47.1	100	47.1	41	47.1	41
47.12	63	47.12	102	47.12	58	47.12	58
47.14	61	47.14	100	47.14	57	47.14	57
47.16	57	47.16	121	47.16	48	47.16	48
47.18	71	47.18	115	47.18	60	47.18	60
47.2	60	47.2	111	47.2	37	47.2	37
47.22	64	47.22	117	47.22	54	47.22	54
47.24	44	47.24	126	47.24	48	47.24	48
47.26	65	47.26	122	47.26	51	47.26	51
47.28	63	47.28	110	47.28	45	47.28	45
47.3	75	47.3	119	47.3	47	47.3	47
47.32	57	47.32	99	47.32	49	47.32	49
47.34	52	47.34	80	47.34	44	47.34	44
47.36	53	47.36	79	47.36	53	47.36	53
47.38	65	47.38	90	47.38	58	47.38	58
47.4	46	47.4	88	47.4	61	47.4	61
47.42	69	47.42	82	47.42	50	47.42	50
47.44	65	47.44	76	47.44	30	47.44	30
47.46	59	47.46	107	47.46	52	47.46	52
47.48	58	47.48	87	47.48	58	47.48	58
47.5	61	47.5	91	47.5	46	47.5	46
47.52	60	47.52	75	47.52	39	47.52	39
47.54	71	47.54	73	47.54	41	47.54	41
47.56	48	47.56	82	47.56	38	47.56	38
47.58	62	47.58	98	47.58	56	47.58	56
47.6	79	47.6	91	47.6	52	47.6	52
47.62	73	47.62	118	47.62	38	47.62	38
47.64	81	47.64	123	47.64	46	47.64	46
47.66	79	47.66	148	47.66	46	47.66	46
47.68	94	47.68	163	47.68	49	47.68	49
47.7	116	47.7	186	47.7	49	47.7	49
47.72	124	47.72	213	47.72	60	47.72	60
47.74	142	47.74	262	47.74	41	47.74	41
47.76	125	47.76	244	47.76	41	47.76	41
47.78	139	47.78	261	47.78	43	47.78	43
47.8	125	47.8	271	47.8	48	47.8	48
47.82	129	47.82	294	47.82	61	47.82	61
47.84	125	47.84	281	47.84	50	47.84	50
47.86	113	47.86	338	47.86	51	47.86	51
47.88	117	47.88	307	47.88	53	47.88	53
47.9	99	47.9	298	47.9	52	47.9	52
47.92	97	47.92	245	47.92	63	47.92	63
47.94	72	47.94	183	47.94	48	47.94	48
47.96	74	47.96	210	47.96	45	47.96	45
47.98	74	47.98	208	47.98	52	47.98	52
48	60	48	176	48	63	48	63
48.02	63	48.02	151	48.02	51	48.02	51
48.04	60	48.04	111	48.04	55	48.04	55
48.06	72	48.06	113	48.06	46	48.06	46
48.08	54	48.08	91	48.08	43	48.08	43
48.1	72	48.1	100	48.1	40	48.1	40
48.12	56	48.12	80	48.12	47	48.12	47
48.14	61	48.14	76	48.14	50	48.14	50
48.16	69	48.16	84	48.16	54	48.16	54
48.18	49	48.18	77	48.18	33	48.18	33
48.2	51	48.2	60	48.2	45	48.2	45
48.22	59	48.22	64	48.22	51	48.22	51
48.24	60	48.24	68	48.24	53	48.24	53
48.26	52	48.26	66	48.26	48	48.26	48
48.28	56	48.28	81	48.28	41	48.28	41
48.3	59	48.3	66	48.3	44	48.3	44
48.32	56	48.32	85	48.32	54	48.32	54
48.34	43	48.34	71	48.34	43	48.34	43
48.36	58	48.36	71	48.36	49	48.36	49
48.38	70	48.38	71	48.38	57	48.38	57
48.4	65	48.4	73	48.4	42	48.4	42
48.42	61	48.42	78	48.42	41	48.42	41
48.44	53	48.44	60	48.44	36	48.44	36
48.46	64	48.46	71	48.46	54	48.46	54
48.48	51	48.48	64	48.48	51	48.48	51
48.5	59	48.5	73	48.5	45	48.5	45
48.52	68	48.52	74	48.52	48	48.52	48
48.54	58	48.54	77	48.54	44	48.54	44
48.56	54	48.56	62	48.56	40	48.56	40
48.58	61	48.58	60	48.58	53	48.58	53
48.6	57	48.6	71	48.6	46	48.6	46
48.62	55	48.62	72	48.62	51	48.62	51
48.64	55	48.64	61	48.64	45	48.64	45
48.66	55	48.66	77	48.66	50	48.66	50
48.68	51	48.68	55	48.68	44	48.68	44
48.7	57	48.7	69	48.7	50	48.7	50
48.72	55	48.72	87	48.72	47	48.72	47
48.74	45	48.74	80	48.74	63	48.74	63
48.76	60	48.76	60	48.76	56	48.76	56
48.78	56	48.78	74	48.78	55	48.78	55
48.8	60	48.8	63	48.8	41	48.8	41
48.82	45	48.82	64	48.82	49	48.82	49
48.84	61	48.84	64	48.84	37	48.84	37
48.86	59	48.86	58	48.86	53	48.86	53
48.88	59	48.88	74	48.88	44	48.88	44
48.9	63	48.9	64	48.9	46	48.9	46
48.92	57	48.92	82	48.92	39	48.92	39
48.94	64	48.94	75	48.94	43	48.94	43
48.96	55	48.96	75	48.96	45	48.96	45
48.98	64	48.98	69	48.98	51	48.98	51
49	76	49	76	49	48	49	48
49.02	67	49.02	77	49.02	44	49.02	44
49.04	45	49.04	87	49.04	43	49.04	43
49.06	61	49.06	58	49.06	44	49.06	44
49.08	51	49.08	83	49.08	51	49.08	51
49.1	61	49.1	69	49.1	39	49.1	39
49.12	53	49.12	81	49.12	56	49.12	56
49.14	55	49.14	88	49.14	46	49.14	46
49.16	63	49.16	73	49.16	53	49.16	53
49.18	42	49.18	72	49.18	52	49.18	52
49.2	48	49.2	71	49.2	52	49.2	52
49.22	57	49.22	91	49.22	37	49.22	37
49.24	58	49.24	62	49.24	49	49.24	49
49.26	62	49.26	71	49.26	45	49.26	45
49.28	65	49.28	73	49.28	47	49.28	47
49.3	67	49.3	73	49.3	40	49.3	40
49.32	67	49.32	59	49.32	39	49.32	39
49.34	50	49.34	65	49.34	45	49.34	45
49.36	69	49.36	74	49.36	39	49.36	39
49.38	57	49.38	71	49.38	46	49.38	46
49.4	61	49.4	59	49.4	49	49.4	49
49.42	49	49.42	73	49.42	51	49.42	51
49.44	55	49.44	87	49.44	47	49.44	47
49.46	48	49.46	74	49.46	46	49.46	46
49.48	58	49.48	66	49.48	46	49.48	46
49.5	60	49.5	69	49.5	47	49.5	47
49.52	47	49.52	80	49.52	40	49.52	40
49.54	62	49.54	99	49.54	42	49.54	42
49.56	64	49.56	83	49.56	44	49.56	44
49.58	58	49.58	80	49.58	45	49.58	45
49.6	53	49.6	81	49.6	37	49.6	37
49.62	68	49.62	86	49.62	41	49.62	41
49.64	65	49.64	89	49.64	41	49.64	41
49.66	58	49.66	77	49.66	39	49.66	39
49.68	59	49.68	90	49.68	48	49.68	48
49.7	62	49.7	93	49.7	42	49.7	42
49.72	53	49.72	79	49.72	52	49.72	52
49.74	56	49.74	87	49.74	43	49.74	43
49.76	35	49.76	81	49.76	46	49.76	46
49.78	56	49.78	79	49.78	41	49.78	41
49.8	61	49.8	92	49.8	45	49.8	45
49.82	60	49.82	100	49.82	57	49.82	57
49.84	57	49.84	83	49.84	47	49.84	47
49.86	88	49.86	91	49.86	41	49.86	41
49.88	64	49.88	97	49.88	44	49.88	44
49.9	69	49.9	117	49.9	29	49.9	29
49.92	72	49.92	124	49.92	51	49.92	51
49.94	60	49.94	113	49.94	45	49.94	45
49.96	74	49.96	118	49.96	43	49.96	43
[truncated: 1,503 more rows]
